# Supplementary material for: Overcoming the cytoplasmic retention of GDOWN1 modulates global transcription and facilitates stress adaptation
Source: eLife journal article supplement (doi:10.7554/elife.79116), 2022-11-22
Supplement: fig2-data1 [file Figure 2-source data 1.xlsx]

## Sheet: IF Assay
	WT (FL)
-LMB										+LMB
ROI	Total	Nuclear	Cytoplasmic	C/T	mean (C/T)	N/T	mean (N/T)	SE		Total	Nuclear	Cytoplasmic	C/T	mean (C/T)	N/T	mean (N/T)	SE
1	12439216	2817553	9621663	0.773494	0.74529	0.226506	0.25471	0.0282043		27915824	6426618	21489206	0.769786	0.789729	0.230214	0.210271	0.0199433
0	22995655	6505798	16489857	0.717086		0.282914				24080107	4583109	19496998	0.809672		0.190328
	m1
-LMB										+LMB
ROI	Total	Nuclear	Cytoplasmic	C/T	mean (C/T)	N/T	mean (N/T)	SE		Total	Nuclear	Cytoplasmic	C/T	mean (C/T)	N/T	mean (N/T)	SE
1	63189498	28355032	34834466	0.55127	0.579252	0.44873	0.420748	0.0279817		45042694	18989335	26053359	0.578415	0.51057	0.421585	0.48943	0.0678446
0	77205022	30323564	46881458	0.607233		0.392767				56204861	31321535	24883326	0.442726		0.557274
	m2
-LMB										+LMB
ROI	Total	Nuclear	Cytoplasmic	C/T	mean (C/T)	N/T	mean (N/T)	SE		Total	Nuclear	Cytoplasmic	C/T	mean (C/T)	N/T	mean (N/T)	SE
1	43785375	12146292	31639083	0.722595	0.785261	0.277405	0.214739	0.0626662		42464612	26595760	15868852	0.373696	0.367641	0.626304	0.632359	0.00605451
0	20365690	3097068	17268622	0.847927		0.152073				58580927	37398831	21182096	0.361587		0.638413
	m3
-LMB										+LMB
ROI	Total	Nuclear	Cytoplasmic	C/T	mean (C/T)	N/T	mean (N/T)	SE		Total	Nuclear	Cytoplasmic	C/T	mean (C/T)	N/T	mean (N/T)	SE
1	23376386	2903257	20473129	0.875804	0.827384	0.124196	0.172616	0.0484197		39056281	7334983	31721298	0.812195	0.824519	0.187805	0.175481	0.0123249
0	44468369	9829093	34639276	0.778964		0.221036				30027946	4899232	25128714	0.836844		0.163156
	m4
-LMB										+LMB
ROI	Total	Nuclear	Cytoplasmic	C/T	mean (C/T)	N/T	mean (N/T)	SE		Total	Nuclear	Cytoplasmic	C/T	mean (C/T)	N/T	mean (N/T)	SE
1	28720107	5153991	23566116	0.820544	0.788779	0.179456	0.211221	0.0317656		35345928	20561449	14784479	0.41828	0.440505	0.58172	0.559495	0.0222253
0	39487577	9594970	29892607	0.757013		0.242987				36845067	19795740	17049327	0.46273		0.53727
	m4*
-LMB										+LMB
ROI	Total	Nuclear	Cytoplasmic	C/T	mean (C/T)	N/T	mean (N/T)	SE		Total	Nuclear	Cytoplasmic	C/T	mean (C/T)	N/T	mean (N/T)	SE
1	214301	119493	94808	0.442406	0.376999	0.557594	0.623001	0.0654071		37170274	18050556	19119718	0.514382	0.424054	0.485618	0.575946	0.0903283
0	135944	93585	42359	0.311592		0.688408				36875525	24569228	12306297	0.333725		0.666275

## Sheet: BiFC Assay
	WT (FL)
-LMB										+LMB
ROI	Total	Nuclear	Cytoplasmic	C/T	mean (C/T)	N/T	mean (N/T)	SE		Total	Nuclear	Cytoplasmic	C/T	mean (C/T)	N/T	mean (N/T)	SE
1	36283637	8017584	28266053	0.77903	0.743029	0.22097	0.256971	0.0333753		9971704	3960166	6011538	0.60286	0.660271	0.39714	0.339729	0.0485412
2	46257828	12536068	33721760	0.728996		0.271004				9172436	4012781	5159655	0.562517		0.437483
3	20512052	3931977	16580075	0.808309		0.191691				15132216	4589422	10542794	0.696712		0.303288
0	7254526	2497155	4757371	0.65578		0.34422				11094856	2452025	8642831	0.778994		0.221006
	m1
-LMB										+LMB
ROI	Total	Nuclear	Cytoplasmic	C/T	mean (C/T)	N/T	mean (N/T)	SE		Total	Nuclear	Cytoplasmic	C/T	mean (C/T)	N/T	mean (N/T)	SE
1	10790323	8991622	1798701	0.166696	0.20387	0.833304	0.79613	0.0301854		12875029	10157576	2717453	0.211064	0.146257	0.788936	0.853743	0.0255061
2	10920176	8663130	2257046	0.206686		0.793314				16711908	14447927	2263981	0.135471		0.864529
3	9021747	6423853	2597894	0.287959		0.712041				14076750	11949499	2127251	0.151118		0.848882
0	186262578	157552059	28710519	0.15414		0.84586				10393215	9485088	908127	0.0873769		0.912623
	m2
-LMB										+LMB
ROI	Total	Nuclear	Cytoplasmic	C/T	mean (C/T)	N/T	mean (N/T)	SE		Total	Nuclear	Cytoplasmic	C/T	mean (C/T)	N/T	mean (N/T)	SE
1	22004683	6580296	15424387	0.700959	0.767401	0.299041	0.232599	0.0244044		10506326	8847256	1659070	0.157912	0.129395	0.842088	0.870605	0.026934
2	15749884	3387040	12362844	0.784948		0.215052				10829784	10032583	797201	0.0736119		0.926388
3	26034052	4773630	21260422	0.816639		0.183361				7353276	6646781	706495	0.0960789		0.903921
0	6944756	1617737	5327019	0.767056		0.232944				5529583	4479079	1050504	0.189979		0.810021
	m3
-LMB										+LMB
ROI	Total	Nuclear	Cytoplasmic	C/T	mean (C/T)	N/T	mean (N/T)	SE		Total	Nuclear	Cytoplasmic	C/T	mean (C/T)	N/T	mean (N/T)	SE
1	8089065	2178610	5910455	0.730672	0.765922	0.269328	0.234078	0.0161475		12875414	2521424	10353990	0.804168	0.737249	0.195832	0.262751	0.0236259
2	16142633	3357577	12785056	0.792006		0.207994				9854721	2654031	7200690	0.730684		0.269316
3	9995220	2052724	7942496	0.794629		0.205371				11433921	3501816	7932105	0.693734		0.306266
0	8025853	2035519	5990334	0.74638		0.25362				7885728	2204759	5680969	0.720411		0.279589
	m4
-LMB										+LMB
ROI	Total	Nuclear	Cytoplasmic	C/T	mean (C/T)	N/T	mean (N/T)	SE		Total	Nuclear	Cytoplasmic	C/T	mean (C/T)	N/T	mean (N/T)	SE
1	15970736	2317052	13653684	0.854919	0.84069	0.145081	0.15931	0.0268619		171706022	119450194	52255828	0.304333	0.271386	0.695667	0.728614	0.0214338
2	13768702	1248814	12519888	0.909301		0.0906995				9619907	7421978	2197929	0.228477		0.771523
3	13753242	2587395	11165847	0.81187		0.18813				135106628	92956065	42150563	0.31198		0.68802
0	14289345	3048367	11240978	0.786669		0.213331				129019295	97957380	31061915	0.240754		0.759246
	m4*
-LMB										+LMB
ROI	Total	Nuclear	Cytoplasmic	C/T	mean (C/T)	N/T	mean (N/T)	SE		Total	Nuclear	Cytoplasmic	C/T	mean (C/T)	N/T	mean (N/T)	SE
1	10662906	8487932	2174974	0.203976	0.279841	0.796024	0.720159	0.0272481		15531919	13815440	1716479	0.110513	0.201114	0.889487	0.798886	0.0311252
2	16555032	11210782	5344250	0.322817		0.677183				12484744	9514491	2970253	0.237911		0.762089
3	9462127	6843828	2618299	0.276714		0.723286				10888793	8596978	2291815	0.210475		0.789525
0	12115321	8288594	3826727	0.315858		0.684142				14480891	10925010	3555881	0.245557		0.754443
