# Supplementary material for: Overcoming the cytoplasmic retention of GDOWN1 modulates global transcription and facilitates stress adaptation
Source: eLife journal article supplement (doi:10.7554/elife.79116), 2022-11-22
Supplement: fig3-figsupp1-data1 [file Figure 3-figure supplement 1-source data 1.xlsx]

## Sheet: sheet1
	m8
	-LMB									+LMB
ROI	Total	Nuclear	Cytoplasmic	C/T	mean (C/T)	N/T	mean (N/T)	SE		Total	Nuclear	Cytoplasmic	C/T	mean (C/T)	N/T	mean (N/T)	SE
0	14825.9	3307.21	11518.6	0.77693	0.715073	0.22307	0.284927	0.0345361		4189.08	1692.04	2497.04	0.596083	0.617846	0.403917	0.382154	0.0373095
1	3332.42	1141.27	2191.16	0.657526		0.342474				1398.93	605.853	793.075	0.566916		0.433084
2	10576.7	3059.19	7517.56	0.710763		0.289237				5789.54	1791.63	3997.91	0.69054		0.30946
	m9
	-LMB									+LMB
ROI	Total	Nuclear	Cytoplasmic	C/T	mean (C/T)	N/T	mean (N/T)	SE		Total	Nuclear	Cytoplasmic	C/T	mean (C/T)	N/T	mean (N/T)	SE
0	15389.8	6862.96	8526.87	0.554059	0.489107	0.445941	0.510893	0.0413071		3879.53	3329.22	550.307	0.141849	0.166426	0.858151	0.833574	0.0202601
1	3577.26	1785.62	1791.64	0.500843		0.499157				3702.09	3143.76	558.333	0.150816		0.849184
2	13910.4	8173.52	5736.91	0.412418		0.587582				2227.08	1766.93	460.146	0.206614		0.793386
	m9*
	-LMB									+LMB
ROI	Total	Nuclear	Cytoplasmic	C/T	mean (C/T)	N/T	mean (N/T)	SE		Total	Nuclear	Cytoplasmic	C/T	mean (C/T)	N/T	mean (N/T)	SE
0	11290986	9156932	2134054	0.189005	0.233873	0.810995	0.766127	0.021602		12668357	8472037	4196320	0.331244	0.226409	0.668756	0.773591	0.0421071
1	13774504	10953749	2820755	0.204781		0.795219				12519826	10561267	1958559	0.156437		0.843563
2	10966471	7978581	2987890	0.272457		0.727543				8746209	7346113	1400096	0.16008		0.83992
3	13864886	10131759	3733127	0.26925		0.73075				15526708	11522768	4003940	0.257874		0.742126
	m10
	-LMB									+LMB
ROI	Total	Nuclear	Cytoplasmic	C/T	mean (C/T)	N/T	mean (N/T)	SE		Total	Nuclear	Cytoplasmic	C/T	mean (C/T)	N/T	mean (N/T)	SE
0	2534750	519252	2015498	0.795147	0.748031	0.204853	0.251969	0.0164881		7673982	6078306	1595676	0.207933	0.148214	0.792067	0.851786	0.0316093
1	6987757	1956072	5031685	0.720072		0.279928				6443608	5451425	992183	0.153979		0.846021
2	9758534	2491691	7266843	0.744665		0.255335				7827001	7360609	466392	0.0595876		0.940412
3	316743442	84811065	231932377	0.732241		0.267759				15193605	12590094	2603511	0.171356		0.828644
	m11
	-LMB									+LMB
ROI	Total	Nuclear	Cytoplasmic	C/T	mean (C/T)	N/T	mean (N/T)	SE		Total	Nuclear	Cytoplasmic	C/T	mean (C/T)	N/T	mean (N/T)	SE
0	4455502	1621230	2834272	0.636129	0.627363	0.363871	0.372637	0.00849828		6759370	6405294	354076	0.052383	0.0654246	0.947617	0.934575	0.0116885
1	12186509	4732626	7453883	0.61165		0.38835				4403729	3963144	440585	0.100048		0.899952
2	11216145	3959942	7256203	0.646943		0.353057				6480577	6098390	382187	0.0589742		0.941026
3	82761843	31885561	50876282	0.614731		0.385269				7001307	6649191	352116	0.0502929		0.949707
