# Supplementary material for: Overcoming the cytoplasmic retention of GDOWN1 modulates global transcription and facilitates stress adaptation
Source: eLife journal article supplement (doi:10.7554/elife.79116), 2022-11-22
Supplement: fig3-figsupp1-data2 [file Figure 3-figure supplement 1-source data 2.xlsx]

## Sheet: sheet1
	m8
	-LMB									+LMB
ROI	Total	Nuclear	Cytoplasmic	C/T	mean (C/T)	N/T	mean (N/T)	SE		Total	Nuclear	Cytoplasmic	C/T	mean (C/T)	N/T	mean (N/T)	SE
1	30377758	7194597	23183161	0.763162	0.797972	0.236838	0.202028	0.0348095		161393	18806	142587	0.883477	0.844445	0.116523	0.155555	0.039032
0	18751293	3135567	15615726	0.832781		0.167219				169405	32964	136441	0.805413		0.194587
	m9
	-LMB									+LMB
ROI	Total	Nuclear	Cytoplasmic	C/T	mean (C/T)	N/T	mean (N/T)	SE		Total	Nuclear	Cytoplasmic	C/T	mean (C/T)	N/T	mean (N/T)	SE
1	11036374	2828180	8208194	0.74374	0.772116	0.25626	0.227884	0.028376		78657700	37916853	40740847	0.517951	0.516299	0.482049	0.483701	0.00165182
0	25128017	5013239	20114778	0.800492		0.199508				53751621	26088482	27663139	0.514648		0.485352
	m9*
	-LMB									+LMB
ROI	Total	Nuclear	Cytoplasmic	C/T	mean (C/T)	N/T	mean (N/T)	SE		Total	Nuclear	Cytoplasmic	C/T	mean (C/T)	N/T	mean (N/T)	SE
1	35088033	18468936	16619097	0.47364	0.464842	0.52636	0.535158	0.00879818		42109995	20828625	21281370	0.505376	0.481204	0.494624	0.518796	0.0241713
0	50846407	27658225	23188182	0.456044		0.543956				43154934	23431702	19723232	0.457033		0.542967
	m10
	-LMB									+LMB
ROI	Total	Nuclear	Cytoplasmic	C/T	mean (C/T)	N/T	mean (N/T)	SE		Total	Nuclear	Cytoplasmic	C/T	mean (C/T)	N/T	mean (N/T)	SE
1	37331752	3230318	34101434	0.91347	0.863253	0.08653	0.136747	0.050217		30455096	16402426	14052670	0.461423	0.438824	0.538577	0.561176	0.0225982
0	41981910	7849105	34132805	0.813036		0.186964				25373693	14812499	10561194	0.416226		0.583774
	m11
	-LMB									+LMB
ROI	Total	Nuclear	Cytoplasmic	C/T	mean (C/T)	N/T	mean (N/T)	SE		Total	Nuclear	Cytoplasmic	C/T	mean (C/T)	N/T	mean (N/T)	SE
1	12953328	2560781	10392547	0.802307	0.818152	0.197693	0.181848	0.0158445		49501546	28782815	20718731	0.418547	0.449584	0.581453	0.550416	0.0310366
0	16971448	2817326	14154122	0.833996		0.166004				69660844	36180419	33480425	0.48062		0.51938
