# Supplementary material for: Overcoming the cytoplasmic retention of GDOWN1 modulates global transcription and facilitates stress adaptation
Source: eLife journal article supplement (doi:10.7554/elife.79116), 2022-11-22
Supplement: fig3-figsupp1-data3 [file Figure 3-figure supplement 1-source data 3.xlsx]

## Sheet: sheet1
	m12
	-LMB									+LMB
ROI	Total	Nuclear	Cytoplasmic	C/T	mean (C/T)	N/T	mean (N/T)	SE		Total	Nuclear	Cytoplasmic	C/T	mean (C/T)	N/T	mean (N/T)	SE
0	8245236	6798246	1446990	0.175494	0.216956	0.824506	0.783044	0.029151		8557565	7743273	814292	0.0951546	0.181037	0.904845	0.818963	0.0292952
1	11678045	8334126	3343919	0.286342		0.713658				15709221	12440512	3268709	0.208076		0.791924
2	9479997	7172071	2307926	0.243452		0.756548				16514264	12788140	3726124	0.225631		0.774369
3	7581261	6349048	1232213	0.162534		0.837466				15348540	12351179	2997361	0.195286		0.804714
	m13
	-LMB									+LMB
ROI	Total	Nuclear	Cytoplasmic	C/T	mean (C/T)	N/T	mean (N/T)	SE		Total	Nuclear	Cytoplasmic	C/T	mean (C/T)	N/T	mean (N/T)	SE
0	1913.7	1614.26	299.442	0.156473	0.132002	0.843527	0.867998	0.0150304		33005.5	24819.6	8185.92	0.248017	0.16453	0.751983	0.83547	0.0432289
1	8228.37	7118.48	1109.9	0.134886		0.865114				9973.35	8942.83	1030.52	0.103327		0.896673
2	8134.88	7283.59	851.282	0.104646		0.895354				1454.45	1247.56	206.888	0.142245		0.857755
	m14
	-LMB									+LMB
ROI	Total	Nuclear	Cytoplasmic	C/T	mean (C/T)	N/T	mean (N/T)	SE		Total	Nuclear	Cytoplasmic	C/T	mean (C/T)	N/T	mean (N/T)	SE
0	50748.2	8689.18	42059.1	0.828779	0.803178	0.171221	0.196822	0.0235257		176326	60141.8	116184	0.658917	0.713387	0.341083	0.286613	0.0705753
1	29791.5	7514.23	22277.2	0.747772		0.252228				49044.5	14902.6	34142	0.696142		0.303858
2	36919	8014.23	28904.7	0.782924		0.217076				51308.2	21291.5	30016.7	0.585027		0.414973
3	35653.9	5232.6	30421.3	0.853239		0.146761				16898.4	1462.36	15436	0.913461		0.0865386
	m15
	-LMB									+LMB
ROI	Total	Nuclear	Cytoplasmic	C/T	mean (C/T)	N/T	mean (N/T)	SE		Total	Nuclear	Cytoplasmic	C/T	mean (C/T)	N/T	mean (N/T)	SE
0	141148	41687.9	99460.1	0.704651	0.672278	0.295349	0.327722	0.0259309		171695	54061	117634	0.685134	0.698447	0.314866	0.301553	0.0138066
1	63810.7	25583	38227.7	0.59908		0.40092				65905.6	21594	44311.6	0.67235		0.32765
2	53414.6	15327	38087.7	0.713057		0.286943				39774.5	11928.7	27845.7	0.700091		0.299909
3	43663.3	14307.5	29355.8	0.672323		0.327677				101676	26820.4	74855.1	0.736215		0.263785
	m16
	-LMB									+LMB
ROI	Total	Nuclear	Cytoplasmic	C/T	mean (C/T)	N/T	mean (N/T)	SE		Total	Nuclear	Cytoplasmic	C/T	mean (C/T)	N/T	mean (N/T)	SE
0	104869	27308.7	77559.9	0.739591	0.692823	0.260409	0.307177	0.0274737		40299.6	19193.5	21106.1	0.523731	0.498692	0.476269	0.501308	0.0411054
1	39898.4	14274.7	25623.7	0.642224		0.357776				131611	52169.7	79441.3	0.603607		0.396393
2	96279.7	24924.8	71354.9	0.741121		0.258879				18619.2	10358.5	8260.75	0.443667		0.556333
3	74453097	26181114	48271983	0.648354		0.351646				83087.5	47877.9	35209.6	0.423765		0.576235
	m17
	-LMB									+LMB
ROI	Total	Nuclear	Cytoplasmic	C/T	mean (C/T)	N/T	mean (N/T)	SE		Total	Nuclear	Cytoplasmic	C/T	mean (C/T)	N/T	mean (N/T)	SE
0	16231386	3218009	13013377	0.801742	0.748422	0.198258	0.251578	0.0224831		14925055	3762474	11162581	0.747909	0.721304	0.252091	0.278696	0.0455258
1	20830133	5231936	15598197	0.748828		0.251172				16162738	3564314	12598424	0.779473		0.220527
2	12166152	3024652	9141500	0.751388		0.248612				13874235	3168668	10705567	0.771615		0.228385
3	27138518	8365981	18772537	0.69173		0.30827				13787965	5705224	8082741	0.586217		0.413783
	m18
	-LMB									+LMB
ROI	Total	Nuclear	Cytoplasmic	C/T	mean (C/T)	N/T	mean (N/T)	SE		Total	Nuclear	Cytoplasmic	C/T	mean (C/T)	N/T	mean (N/T)	SE
0	40765.2	13730.2	27035	0.663188	0.774761	0.336812	0.225239	0.0416204		63505.9	14570.8	48935.1	0.77056	0.632038	0.22944	0.367962	0.0632763
1	83268.7	19158.6	64110.1	0.769918		0.230082				46072.6	18073.7	27998.9	0.607713		0.392287
2	68488.7	13339.5	55149.2	0.80523		0.19477				95086596	50332611	44753985	0.470666		0.529334
3	28089.5	3912.66	24176.8	0.860707		0.139293				172831	55441.9	117389	0.679213		0.320787
