# Supplementary material for: Overcoming the cytoplasmic retention of GDOWN1 modulates global transcription and facilitates stress adaptation
Source: eLife journal article supplement (doi:10.7554/elife.79116), 2022-11-22
Supplement: fig3-figsupp2-data2 [file Figure 3-figure supplement 2-source data 2.xlsx]

## Sheet: Sheet1
	WT
-LMB										+LMB
ROI	Total	Nuclear	Cytoplasmic	C/T	mean (C/T)	N/T	mean (N/T)	SE		Total	Nuclear	Cytoplasmic	C/T	mean (C/T)	N/T	mean (N/T)	SE
1	27513.9	4145.05	23368.8	0.849347	0.839461	0.150653	0.160539	0.0172244		39258.9	5646.68	33612.2	0.856168	0.86784	0.143832	0.13216	0.0137348
2	17814.1	3388.09	14426	0.809808		0.190192				24620.9	2984.67	21636.2	0.878775		0.121225
3	8577.18	1588.56	6988.63	0.814793		0.185207				22994.8	3759.08	19235.7	0.836525		0.163475
0	17825.7	2069.61	15756.1	0.883898		0.116102				12059.8	1207.28	10852.5	0.899892		0.100108
	mCAS/m11
	-LMB									+LMB
ROI	Total	Nuclear	Cytoplasmic	C/T	mean (C/T)	N/T	mean (N/T)	SE		Total	Nuclear	Cytoplasmic	C/T	mean (C/T)	N/T	mean (N/T)	SE
1	11123.4	1529.87	9593.58	0.862465	0.883491	0.137535	0.116509	0.00722474		11128.9	5550.07	5578.85	0.501293	0.504072	0.498707	0.495928	0.0292276
2	14603.5	1671.42	12932.1	0.885546		0.114454				16726.5	6985.27	9741.24	0.582383		0.417617
3	9577.25	1023.33	8553.92	0.89315		0.10685				18924.4	10574.5	8349.9	0.441225		0.558775
0	14592	1564.19	13027.8	0.892805		0.107195				15076.3	7668.02	7408.28	0.491386		0.508614
