# Supplementary material for: Overcoming the cytoplasmic retention of GDOWN1 modulates global transcription and facilitates stress adaptation
Source: eLife journal article supplement (doi:10.7554/elife.79116), 2022-11-22
Supplement: fig4-data1 [file Figure 4-source data 1.xlsx]

## Sheet: Sheet1
	(a)
-LMB										+LMB
ROI	Total	Nuclear	Cytoplasmic	C/T	mean (C/T)	N/T	mean (N/T)	SE		Total	Nuclear	Cytoplasmic	C/T	mean (C/T)	N/T	mean (N/T)	SE
1	9193.68	1146.44	8047.24	0.875301	0.860545	0.124699	0.139455	0.0172024		8202.49	1429.42	6773.06	0.825733	0.848878	0.174267	0.151122	0.00824505
2	13046.6	1388.26	11658.4	0.893592		0.106408				5025.71	738.337	4287.38	0.853088		0.146912
3	13558	1897.02	11661	0.860081		0.139919				7721.11	1043.97	6677.14	0.86479		0.13521
0	13314.5	2487.07	10827.4	0.813206		0.186794				3981.5	589.658	3391.84	0.8519		0.1481
	(b)
-LMB										+LMB
ROI	Total	Nuclear	Cytoplasmic	C/T	mean (C/T)	N/T	mean (N/T)	SE		Total	Nuclear	Cytoplasmic	C/T	mean (C/T)	N/T	mean (N/T)	SE
1	8620.6	983.443	7637.15	0.885919	0.848864	0.114081	0.151136	0.0157611		16561	10116.3	6444.67	0.389147	0.380017	0.610853	0.619983	0.0221374
2	5256.12	774.989	4481.13	0.852555		0.147445				9549.19	5466.76	4082.43	0.427516		0.572484
3	9308.18	1414.5	7893.68	0.848037		0.151963				12414.5	8434.74	3979.79	0.320575		0.679425
0	6734.62	1286.68	5447.93	0.808945		0.191055				30595.6	18882.7	11712.9	0.38283		0.61717
	(c)
-LMB										+LMB
ROI	Total	Nuclear	Cytoplasmic	C/T	mean (C/T)	N/T	mean (N/T)	SE		Total	Nuclear	Cytoplasmic	C/T	mean (C/T)	N/T	mean (N/T)	SE
1	5871.95	1130.07	4741.89	0.807548	0.821871	0.192452	0.178129	0.00960413		30893.1	5702.47	25190.6	0.815413	0.832009	0.184587	0.167991	0.0132129
2	9865.39	1493.95	8371.44	0.848566		0.151434				30996.9	4150.96	26845.9	0.866085		0.133915
3	4100.49	725.018	3375.47	0.823187		0.176813				15958.1	3074.01	12884.1	0.80737		0.19263
0	4766.81	914.356	3852.46	0.808183		0.191817				27097.9	4358.17	22739.7	0.839169		0.160831
	(d)
-LMB										+LMB
ROI	Total	Nuclear	Cytoplasmic	C/T	mean (C/T)	N/T	mean (N/T)	SE		Total	Nuclear	Cytoplasmic	C/T	mean (C/T)	N/T	mean (N/T)	SE
1	17537	4934.14	12602.9	0.718644	0.750384	0.281356	0.249616	0.0177402		9441.94	5035.64	4406.3	0.466673	0.529325	0.533327	0.470675	0.0299309
2	10029	2415.57	7613.46	0.759143		0.240857				16784.1	7904.5	8879.58	0.529048		0.470952
3	12306.9	2501.75	9805.17	0.79672		0.20328				13430.1	6559.66	6870.45	0.51157		0.48843
0	19216.4	5245.51	13970.9	0.72703		0.27297				18585.9	7248.37	11337.6	0.610008		0.389992
	(e)
		-LMB									+LMB
ROI	Total	Nuclear	Cytoplasmic	C/T	mean (C/T)	N/T	mean (N/T)	SE		Total	Nuclear	Cytoplasmic	C/T	mean (C/T)	N/T	mean (N/T)	SE
1	4661.38	370.833	4290.55	0.920446	0.885989	0.0795543	0.114011	0.0203948		9573.06	3345.16	6227.9	0.650565	0.664294	0.349435	0.335706	0.0220031
2	9363.1	1440.12	7922.98	0.846192		0.153808				3457.33	1102.56	2354.77	0.681096		0.318904
3	8343.54	651.867	7691.67	0.921872		0.0781283				7462.1	2901.91	4560.19	0.611114		0.388886
0	5197.19	751.264	4445.93	0.855448		0.144552				3787.42	1081.68	2705.74	0.714401		0.285599
	(f)
-LMB										+LMB
ROI	Total	Nuclear	Cytoplasmic	C/T	mean (C/T)	N/T	mean (N/T)	SE		Total	Nuclear	Cytoplasmic	C/T	mean (C/T)	N/T	mean (N/T)	SE
1	13084.4	7753.56	5330.89	0.407422	0.572558	0.592578	0.427442	0.0620471		15267.7	4504.7	10763	0.704953	0.619329	0.295047	0.380671	0.0823814
2	15579.4	6637.86	8941.57	0.573934		0.426066				33937	6510	27427	0.808174		0.191826
3	8841.92	3519.84	5322.08	0.601915		0.398085				318067	158450	159617	0.501835		0.498165
0	12158.5	3562.9	8595.6	0.706962		0.293038				277606	149254	128352	0.462353		0.537647
	(g)
-LMB										+LMB
ROI	Total	Nuclear	Cytoplasmic	C/T	mean (C/T)	N/T	mean (N/T)	SE		Total	Nuclear	Cytoplasmic	C/T	mean (C/T)	N/T	mean (N/T)	SE
1	16004.3	1702.99	14301.3	0.893592	0.871509	0.106408	0.128491	0.0175889		18677.9	8662.5	10015.4	0.536216	0.504456	0.463784	0.495544	0.0367924
2	10610.6	1878.33	8732.26	0.822976		0.177024				16177.9	7219.8	8958.13	0.553725		0.446275
3	7535.32	990.016	6545.31	0.868617		0.131383				9310.99	4348.67	4962.32	0.532953		0.467047
0	3122.59	309.604	2812.99	0.90085		0.0991496				7204.55	4359.26	2845.29	0.39493		0.60507
