# Supplementary material for: Overcoming the cytoplasmic retention of GDOWN1 modulates global transcription and facilitates stress adaptation
Source: eLife journal article supplement (doi:10.7554/elife.79116), 2022-11-22
Supplement: fig4-figsupp1-data1 [file Figure 4-figure supplement 1-source data 1.xlsx]

## Sheet: sheet1
Flag-fGdown1 WT(①)
-LMB										+LMB
ROI	Total	Nuclear	Cytoplasmic	C/T	mean (C/T)	N/T	mean (N/T)	SE		Total	Nuclear	Cytoplasmic	C/T	mean (C/T)	N/T	mean (N/T)	SE
0	16808886	2902532	13906354	0.827322	0.870914	0.172678	0.129086	0.0159791		37948699	2404975	35543724	0.936626	0.857344	0.0633744	0.142656	0.0419325
1	23464172	2410665	21053507	0.897262		0.102738				20278207	5099274	15178933	0.748534		0.251466
2	16660166	1795954	14864212	0.892201		0.107799				17789406	2908970	14880436	0.836477		0.163523
3	18694280	2488762	16205518	0.86687		0.13313				33976179	3134753	30841426	0.907737		0.0922633
Flag-fGdown1 R325A, R328A(②)
-LMB										+LMB
ROI	Total	Nuclear	Cytoplasmic	C/T	mean (C/T)	N/T	mean (N/T)	SE		Total	Nuclear	Cytoplasmic	C/T	mean (C/T)	N/T	mean (N/T)	SE
0	26334204	3709287	22624917	0.859146	0.860089	0.140854	0.139911	0.00888972		32195659	14196333	17999326	0.559061	0.581025	0.440939	0.418975	0.0233214
1	28906891	4545443	24361448	0.842756		0.157244				20478556	7701404	12777152	0.623928		0.376072
2	34500399	3977259	30523140	0.884718		0.115282				35510959	13664987	21845972	0.61519		0.38481
3	15692574	2295286	13397288	0.853734		0.146266				47166123	22360412	24805711	0.525922		0.474078
Flag-zGdown1 WT(③)
-LMB										+LMB
ROI	Total	Nuclear	Cytoplasmic	C/T	mean (C/T)	N/T	mean (N/T)	SE		Total	Nuclear	Cytoplasmic	C/T	mean (C/T)	N/T	mean (N/T)	SE
0	32411275	3370320	29040955	0.896014	0.908593	0.103986	0.0914074	0.00854944		42264090	4783770	37480320	0.886812	0.897404	0.113188	0.102596	0.00470187
1	43981581	2919775	41061806	0.933614		0.0663863				56106908	5566428	50540480	0.900789		0.0992111
2	52389488	4969198	47420290	0.905149		0.0948511				37589607	4006974	33582633	0.893402		0.106598
3	23959824	2405716	21554108	0.899594		0.100406				31724306	2899197	28825109	0.908613		0.0913872
Flag-zGdown1 R328A, H331A(④)
-LMB										+LMB
ROI	Total	Nuclear	Cytoplasmic	C/T	mean (C/T)	N/T	mean (N/T)	SE		Total	Nuclear	Cytoplasmic	C/T	mean (C/T)	N/T	mean (N/T)	SE
0	27155695	2338599	24817096	0.913882	0.886426	0.0861182	0.113574	0.0106464		37490686	10173088	27317598	0.72865	0.692601	0.27135	0.307399	0.0191267
1	26482070	3231506	23250564	0.877974		0.122026				16190820	4898943	11291877	0.697425		0.302575
2	29204023	3205581	25998442	0.890235		0.109765				38215264	13804926	24410338	0.638759		0.361241
3	43586666	5944606	37642060	0.863614		0.136386				27718217	8161102	19557115	0.705569		0.294431
