# Supplementary material for: Overcoming the cytoplasmic retention of GDOWN1 modulates global transcription and facilitates stress adaptation
Source: eLife journal article supplement (doi:10.7554/elife.79116), 2022-11-22
Supplement: fig4-figsupp1-data2 [file Figure 4-figure supplement 1-source data 2.xlsx]

## Sheet: sheet1
YC-NELF-E+VN-fGdown1 WT(①)
-LMB										+LMB
ROI	Total	Nuclear	Cytoplasmic	C/T	mean (C/T)	N/T	mean (N/T)	SE		Total	Nuclear	Cytoplasmic	C/T	mean (C/T)	N/T	mean (N/T)	SE
0	181220263	57402770	123817493	0.683243	0.725151	0.316757	0.274849	0.0348163		9247663	4011629	5236034	0.566201	0.561846	0.433799	0.438154	0.00979554
1	340276743	83097085	257179658	0.755796		0.244204				14533642	6783756	7749886	0.533238		0.466762
2	17690987	3404573	14286414	0.807553		0.192447				19789255	8368362	11420893	0.577126		0.422874
3	160454097	55515049	104939048	0.654013		0.345987				13152287	5644682	7507605	0.570821		0.429179
YC-NELF-E+VN-fGdown1 R325A, R328A(②)
-LMB										+LMB
ROI	Total	Nuclear	Cytoplasmic	C/T	mean (C/T)	N/T	mean (N/T)	SE		Total	Nuclear	Cytoplasmic	C/T	mean (C/T)	N/T	mean (N/T)	SE
0	14095402	3154890	10940512	0.776176	0.728093	0.223824	0.271907	0.0206307		18540464	16111200	2429264	0.131025	0.201905	0.868975	0.798095	0.0274694
1	311729927	79336962	232392965	0.745495		0.254505				17651308	13298632	4352676	0.246592		0.753408
2	21453128	6818932	14634196	0.682147		0.317853				17254456	13043035	4211421	0.244077		0.755923
3	216923246	63221054	153702192	0.708556		0.291444				259187778	210998560	48189218	0.185924		0.814076
YC-NELF-E+VN-zGdown1 WT(③)
-LMB										+LMB
ROI	Total	Nuclear	Cytoplasmic	C/T	mean (C/T)	N/T	mean (N/T)	SE		Total	Nuclear	Cytoplasmic	C/T	mean (C/T)	N/T	mean (N/T)	SE
0	10397267	1882080	8515187	0.818983	0.795323	0.181017	0.204677	0.00791872		17270099	9321482	7948617	0.460253	0.415987	0.539747	0.584013	0.030416
1	34107114	7308543	26798571	0.785718		0.214282				24882529	16479316	8403213	0.337715		0.662285
2	23744866	5048531	18696335	0.787384		0.212616				26031596	13851407	12180189	0.4679		0.5321
3	18023461	3799195	14224266	0.789208		0.210792				16450565	9901945	6548620	0.398079		0.601921
YC-NELF-E+VN-zGdown1 R328A, H331A(④)
-LMB										+LMB
ROI	Total	Nuclear	Cytoplasmic	C/T	mean (C/T)	N/T	mean (N/T)	SE		Total	Nuclear	Cytoplasmic	C/T	mean (C/T)	N/T	mean (N/T)	SE
0	19411270	11382697	8028573	0.413604	0.476496	0.586396	0.523504	0.0436569		7244572	6415964	828608	0.114376	0.0382615	0.885624	0.961738	0.0262022
1	10094537	3988014	6106523	0.604933		0.395067				8214235	8213290	945	0.000115044		0.999885
2	10253789	5584495	4669294	0.455373		0.544627				5925617	5742635	182982	0.0308798		0.96912
3	175285541	99549121	75736420	0.432075		0.567925				6455565	6406019	49546	0.00767493		0.992325
