# Supplementary material for: Overcoming the cytoplasmic retention of GDOWN1 modulates global transcription and facilitates stress adaptation
Source: eLife journal article supplement (doi:10.7554/elife.79116), 2022-11-22
Supplement: fig5-data1 [file Figure 5-source data 1.xlsx]

## Sheet: iWT-Venus-Flag
induction time	iWT-Venus-Flag 0 days				iWT-Venus-Flag 3 days				iWT-Venus-Flag 6 days				iWT-Venus-Flag 9 days
ROI	A1 ROI:1	A1 ROI:2	A1 ROI:3	A1 ROI:4	A2 ROI:1	A2 ROI:2	A2 ROI:3	A2 ROI:4	B1 ROI:1	B1 ROI:2	B1 ROI:3	B1 ROI:4	B2 ROI:1	B2 ROI:2	B2 ROI:3	B2 ROI:4
Cell Count(Total)	14604	17056	15580	15614	13677	14117	15228	14515	22804	19790	21729	17186	21780	23810	51345	22465
induction time	iWT-Venus-Flag 0 days				iWT-Venus-Flag 3 days				iWT-Venus-Flag 6 days				iWT-Venus-Flag 9 days
ROI	A1 ROI:1	A1 ROI:2	A1 ROI:3	A1 ROI:4	A2 ROI:1	A2 ROI:2	A2 ROI:3	A2 ROI:4	B1 ROI:1	B1 ROI:2	B1 ROI:3	B1 ROI:4	B2 ROI:1	B2 ROI:2	B2 ROI:3	B2 ROI:4
Cell Count(Venus+)	404	980	1160	751	4980	5467	5522	6095	11091	9877	10818	8082	11362	12095	5333	11491
induction time	iWT-Venus-Flag 0 days				iWT-Venus-Flag 3 days				iWT-Venus-Flag 6 days				iWT-Venus-Flag 9 days
ROI	A1 ROI:1	A1 ROI:2	A1 ROI:3	A1 ROI:4	A2 ROI:1	A2 ROI:2	A2 ROI:3	A2 ROI:4	B1 ROI:1	B1 ROI:2	B1 ROI:3	B1 ROI:4	B2 ROI:1	B2 ROI:2	B2 ROI:3	B2 ROI:4
Venus+ Ratio	0.0276637	0.0574578	0.0744544	0.0480979	0.364115	0.387264	0.362621	0.41991	0.486362	0.49909	0.49786	0.470266	0.521671	0.50798	0.103866	0.511507
Averaged value	0.0519184				0.383478				0.488395				0.411256
STDEV	0.00975298				0.0133902				0.00668801				0.102504
induction time	iWT-Venus-Flag 0 days				iWT-Venus-Flag 3 days				iWT-Venus-Flag 6 days				iWT-Venus-Flag 9 days
ROI	A1 ROI:1	A1 ROI:2	A1 ROI:3	A1 ROI:4	A2 ROI:1	A2 ROI:2	A2 ROI:3	A2 ROI:4	B1 ROI:1	B1 ROI:2	B1 ROI:3	B1 ROI:4	B2 ROI:1	B2 ROI:2	B2 ROI:3	B2 ROI:4
Object(Venus+) Mean	24	55	67	42	361	385	361	432	526	545	545	503	571	559	114	570
Averaged value	47				384.75				529.75				453.5
STDEV	9.2105				16.7351				9.9781				113.199

## Sheet: i10M-Venus-Flag
induction time	i10M-Venus-Flag 0 days				i10M-Venus-Flag 3 days				i10M-Venus-Flag 6 days				i10M-Venus-Flag 9 days
ROI	A1 ROI:1	A1 ROI:2	A1 ROI:3	A1 ROI:4	A2 ROI:1	A2 ROI:2	A2 ROI:3	A2 ROI:4	B1 ROI:1	B1 ROI:2	B1 ROI:3	B1 ROI:4	B2 ROI:1	B2 ROI:2	B2 ROI:3	B2 ROI:4
Cell Count(Total)	8660	12338	10742	11073	8298	8485	8591	8382	15047	14371	15748	12362	8810	12511	12559	12749
induction time	i10M-Venus-Flag 0 days				i10M-Venus-Flag 3 days				i10M-Venus-Flag 6 days				i10M-Venus-Flag 9 days
ROI	A1 ROI:1	A1 ROI:2	A1 ROI:3	A1 ROI:4	A2 ROI:1	A2 ROI:2	A2 ROI:3	A2 ROI:4	B1 ROI:1	B1 ROI:2	B1 ROI:3	B1 ROI:4	B2 ROI:1	B2 ROI:2	B2 ROI:3	B2 ROI:4
Cell Count(Venus Positive)	1132	1541	1215	1708	4785	5012	4573	4652	4544	5215	5629	4385	1159	1897	2985	3507
induction time	i10M-Venus-Flag 0 days				i10M-Venus-Flag 3 days				i10M-Venus-Flag 6 days				i10M-Venus-Flag 9 days
ROI	A1 ROI:1	A1 ROI:2	A1 ROI:3	A1 ROI:4	A2 ROI:1	A2 ROI:2	A2 ROI:3	A2 ROI:4	B1 ROI:1	B1 ROI:2	B1 ROI:3	B1 ROI:4	B2 ROI:1	B2 ROI:2	B2 ROI:3	B2 ROI:4
Venus Positive Ratio	0.130716	0.124899	0.113107	0.154249	0.576645	0.590689	0.532301	0.554999	0.301987	0.362884	0.357442	0.354716	0.131555	0.151627	0.237678	0.27508
Averaged value	0.130743				0.563659				0.344257				0.198985
STDEV	0.00864921				0.0127723				0.0141919				0.0342507
induction time	i10M-Venus-Flag 0 days				i10M-Venus-Flag 3 days				i10M-Venus-Flag 6 days				i10M-Venus-Flag 9 days
ROI	A1 ROI:1	A1 ROI:2	A1 ROI:3	A1 ROI:4	A2 ROI:1	A2 ROI:2	A2 ROI:3	A2 ROI:4	B1 ROI:1	B1 ROI:2	B1 ROI:3	B1 ROI:4	B2 ROI:1	B2 ROI:2	B2 ROI:3	B2 ROI:4
Object(Venus+) Mean	135	111	98	135	521	583	496	517	285	343	340	327	113	130	214	270
Averaged value	119.75				529.25				323.75				181.75
STDEV	9.19579				18.7367				13.3752				36.7795

## Sheet: iNLS-WT-Venus-Flag
Cell line; induction time	iNLS-GDOWN1-Venus-Flag; 0 day				iNLS-GDOWN1-Venus-Flag; 3 days				iNLS-GDOWN1-Venus-Flag; 6 days				iNLS-GDOWN1-Venus-Flag; 9 days
ROI	A3 ROI:1	A3 ROI:2	A3 ROI:3	A3 ROI:4	B3 ROI:1	B3 ROI:2	B3 ROI:3	B3 ROI:4	A3 ROI:1	A3 ROI:2	A3 ROI:3	A3 ROI:4	B3 ROI:1	B3 ROI:2	B3 ROI:3	B3 ROI:4
Cell Count(Total)	17874	19872	19813	19886	16943	16820	17049	16551	16938	19112	18911	18962	19746	18686	18785	18028
Cell line; induction time	iNLS-GDOWN1-Venus-Flag; 0 day				iNLS-GDOWN1-Venus-Flag; 3 days				iNLS-GDOWN1-Venus-Flag; 6 days				iNLS-GDOWN1-Venus-Flag; 9 days
ROI	A3 ROI:1	A3 ROI:2	A3 ROI:3	A3 ROI:4	B3 ROI:1	B3 ROI:2	B3 ROI:3	B3 ROI:4	A3 ROI:1	A3 ROI:2	A3 ROI:3	A3 ROI:4	B3 ROI:1	B3 ROI:2	B3 ROI:3	B3 ROI:4
Cell Count(Venus+)	836	1289	1745	2103	14184	14561	14859	14573	13657	15368	15980	16296	13973	13930	13323	13181
Cell line; induction time	iNLS-GDOWN1-Venus-Flag; 0 day				iNLS-GDOWN1-Venus-Flag; 3 days				iNLS-GDOWN1-Venus-Flag; 6 days				iNLS-GDOWN1-Venus-Flag; 9 days
ROI	A1 ROI:1	A1 ROI:2	A1 ROI:3	A1 ROI:4	A2 ROI:1	A2 ROI:2	A2 ROI:3	A2 ROI:4	B1 ROI:1	B1 ROI:2	B1 ROI:3	B1 ROI:4	B2 ROI:1	B2 ROI:2	B2 ROI:3	B2 ROI:4
Venus+ Ratio	0.0467718	0.0648651	0.0880735	0.105753	0.83716	0.865696	0.871547	0.880491	0.806294	0.804102	0.845011	0.859403	0.707637	0.745478	0.709236	0.73114
Averaged value	0.0763658				0.863723				0.828702				0.723373
SE	0.0129381				0.00936239				0.0138919				0.00911242
Cell line; induction time	iNLS-GDOWN1-Venus-Flag; 0 day				iNLS-GDOWN1-Venus-Flag; 3 days				iNLS-GDOWN1-Venus-Flag; 6 days				iNLS-GDOWN1-Venus-Flag; 9 days
ROI	A3 ROI:1	A3 ROI:2	A3 ROI:3	A3 ROI:4	B3 ROI:1	B3 ROI:2	B3 ROI:3	B3 ROI:4	A3 ROI:1	A3 ROI:2	A3 ROI:3	A3 ROI:4	B3 ROI:1	B3 ROI:2	B3 ROI:3	B3 ROI:4
Object Mean	42	57	80	95	1089	1206	1202	1242	1080	1096	1162	1214	862	926	898	948
Averaged value	68.5				1184.75				1138				908.5
SE	11.7934				33.1597				30.93				18.5719

## Sheet: iNLS-10M-Venus-Flag
Cell line; induction time	iNLS-GDOWN1(10M)-Venus-Flag; 0 day				iNLS-GDOWN1(10M)-Venus-Flag; 3 days				iNLS-GDOWN1(10M)-Venus-Flag; 6 days				iNLS-GDOWN1(10M)-Venus-Flag; 9 days
ROI	A1 ROI:1	A1 ROI:2	A1 ROI:3	A1 ROI:4	A2 ROI:1	A2 ROI:2	A2 ROI:3	A2 ROI:4	B1 ROI:1	B1 ROI:2	B1 ROI:3	B1 ROI:4	B2 ROI:1	B2 ROI:2	B2 ROI:3	B2 ROI:4
Cell Count(Total)	12980	14762	13733	14796	8495	8925	9573	10127	15930	14546	16177	14558	20103	22203	19044	18509
Cell line; induction time	iNLS-GDOWN1(10M)-Venus-Flag; 0 day				iNLS-GDOWN1(10M)-Venus-Flag; 3 days				iNLS-GDOWN1(10M)-Venus-Flag; 6 days				iNLS-GDOWN1(10M)-Venus-Flag; 9 days
ROI	A1 ROI:1	A1 ROI:2	A1 ROI:3	A1 ROI:4	A2 ROI:1	A2 ROI:2	A2 ROI:3	A2 ROI:4	B1 ROI:1	B1 ROI:2	B1 ROI:3	B1 ROI:4	B2 ROI:1	B2 ROI:2	B2 ROI:3	B2 ROI:4
Cell Count(Venus+)	1688	1352	2210	2002	4552	4540	4500	5797	2056	1782	1970	2117	1094	1098	997	1404
Cell line; induction time	iNLS-GDOWN1(10M)-Venus-Flag; 0 day				iNLS-GDOWN1(10M)-Venus-Flag; 3 days				iNLS-GDOWN1(10M)-Venus-Flag; 6 days				iNLS-GDOWN1(10M)-Venus-Flag; 9 days
ROI	A1 ROI:1	A1 ROI:2	A1 ROI:3	A1 ROI:4	A2 ROI:1	A2 ROI:2	A2 ROI:3	A2 ROI:4	B1 ROI:1	B1 ROI:2	B1 ROI:3	B1 ROI:4	B2 ROI:1	B2 ROI:2	B2 ROI:3	B2 ROI:4
Venus+ Ratio	0.130046	0.0915865	0.160926	0.135307	0.535845	0.508683	0.470072	0.57243	0.129065	0.122508	0.121778	0.145418	0.0544197	0.0494528	0.0523524	0.075855
Averaged value	0.129466				0.521758				0.129692				0.05802
SE	0.0143151				0.0216188				0.00549209				0.00603163
Cell line; induction time	iNLS-GDOWN1(10M)-Venus-Flag; 0 day				iNLS-GDOWN1(10M)-Venus-Flag; 3 days				iNLS-GDOWN1(10M)-Venus-Flag; 6 days				iNLS-GDOWN1(10M)-Venus-Flag; 9 days
ROI	A1 ROI:1	A1 ROI:2	A1 ROI:3	A1 ROI:4	A2 ROI:1	A2 ROI:2	A2 ROI:3	A2 ROI:4	B1 ROI:1	B1 ROI:2	B1 ROI:3	B1 ROI:4	B2 ROI:1	B2 ROI:2	B2 ROI:3	B2 ROI:4
Object Mean	115	93	146	118	505	484	447	557	124	119	129	139	55	48	55	77
Averaged value	118				498.25				127.75				58.75
SE	10.8704				22.9615				4.26956				6.30311
