# Supplementary material for: Overcoming the cytoplasmic retention of GDOWN1 modulates global transcription and facilitates stress adaptation
Source: eLife journal article supplement (doi:10.7554/elife.79116), 2022-11-22
Supplement: fig5-data2 [file Figure 5-source data 2.xlsx]

## Sheet: Sheet3
The starting cell number for each cell type was 0.6 X 10^5. We passaged the cells every three days. After acquiring the cell number information during each time of the passage, we replated the same number of cells (6 X 10^4) into fresh dishes for further culture.
The original readings (raw data)		Day 0						Day 3							Day 6								Day 9
Cell line	Dox	repeat 1	repeat 2	repeat 3	mean			repeat 1	repeat 2	repeat 3	repeat 4	mean			repeat 1	repeat 2	repeat 3	repeat 4	repeat 5	mean			repeat 1	repeat 2	repeat 3	repeat 4	repeat 5	mean
iGDOWN1-Venus-Flag	-	0.6	0.6	0.6	0.6			3.72	3.93	3.18	3.61	3.61			6.52	5.88	6.02	6.73	5.93	6.216			6.75	6.51	6.73			6.66333
	+	0.6	0.6	0.6	0.6			4.16	5.03	4.47	4.64	4.575			5.97	6.17	6.39			6.17667			6.35	6.08	6.06			6.16333
iGDOWN1(10M)-Venus-Flag	-	0.6	0.6	0.6	0.6			4.76	4.41	4.62	4.59	4.595			5.92	5.33	6.05			5.76667			6.32	6.54	5.95	6.73	5.87	6.282
	+	0.6	0.6	0.6	0.6			4.02	4.53	4.31	4.28	4.285			5.42	5.09	4.99			5.16667			4.82	4.68	4.6			4.7
iNLS-GDOWN1-Venus-Flag	-	0.6	0.6	0.6	0.6			3.45	3.93	3.91	3.76	3.7625			6.75	6.31	6.11	7.09	6.35	6.522			6.38	6.21	5.95	5.95		6.1225
	+	0.6	0.6	0.6	0.6			4.27	4.13	4.2	4.55	4.2875			6.54	6.71	6.55			6.6			5.79	6.19	6.22			6.06667
iNLS-GDOWN1(10M)-Venus-Flag	-	0.6	0.6	0.6	0.6			4.49	4.23	3.91	4.21	4.21			5.95	6.08	6.71	6.31	5.94	6.198			6.36	5.6	6.03	7.45	5.65	6.218
	+	0.6	0.6	0.6	0.6			3.2	3.18	3.23	3.2	3.2025			4.73	5.36	5.95	5.37	5.54	5.39			4.94	4.58	4.58			4.7
The calculated cell count values	The data for day 0 and day 3 remain to use the raw data since no additional dilution or passage was invloved. The data calculated for day 6 = the raw data on day 6 x the dilution factor on day 3 [(the mean value on day 3) / 0.6];
	The data calculated for day 9 = the raw data on day 9 x the dilution factor on day 6 [(the mean value on day 6) / 0.6] x the dilution factor on day 3 [(the mean value on day 3) / 0.6]
		Day 0						Day 3							Day 6								Day 9
Cell line	Dox	repeat 1	repeat 2	repeat 3	mean	SE		repeat 1	repeat 2	repeat 3	repeat 4	mean	SE		repeat 1	repeat 2	repeat 3	repeat 4	repeat 5	mean	SE		repeat 1	repeat 2	repeat 3	repeat 4	repeat 5	mean	SE
iGDOWN1-Venus-Flag	-	0.6	0.6	0.6	0.6	0		3.72	3.93	3.18	3.61	3.61	0.157956		39.2287	35.378	36.2203	40.4922	35.6788	37.3996	1.03315		420.75	405.79	419.503			415.348	4.79242
	+	0.6	0.6	0.6	0.6	0		4.16	5.03	4.47	4.64	4.575	0.181315		45.571	47.0977	48.777			47.1486	0.925842		499.004	477.787	476.215			484.335	7.34846
iGDOWN1(10M)-Venus-Flag	-	0.6	0.6	0.6	0.6	0		4.76	4.41	4.62	4.59	4.595	0.0719375		45.3867	40.8633	46.3833			44.2111	1.69844		465.679	481.889	438.416	495.889	432.521	462.879	12.2043
	+	0.6	0.6	0.6	0.6	0		4.02	4.53	4.31	4.28	4.285	0.104443		38.753	36.3935	35.6785			36.9417	0.928889		296.751	288.132	283.207			289.363	3.95818
iNLS-GDOWN1-Venus-Flag	-	0.6	0.6	0.6	0.6	0		3.45	3.93	3.91	3.76	3.7625	0.110858		42.3	39.5427	38.2893	44.4307	39.7933	40.8712	1.10236		434.584	423.005	405.294	405.294		417.044	7.18394
	+	0.6	0.6	0.6	0.6	0		4.27	4.13	4.2	4.55	4.2875	0.0920484		46.761	47.9765	46.8325			47.19	0.393791		455.384	486.844	489.203			477.143	10.9012
iNLS-GDOWN1(10M)-Venus-Flag	-	0.6	0.6	0.6	0.6	0		4.49	4.23	3.91	4.21	4.21	0.118603		41.7492	42.6613	47.0818	44.2752	41.679	43.4893	1.01278		460.994	405.907	437.075	540.001	409.531	450.701	24.4618
	+	0.6	0.6	0.6	0.6	0		3.2	3.18	3.23	3.2	3.2025	0.0103078		25.2267	28.5867	31.7333	28.64	29.5467	28.7467	1.04851		236.708	219.458	219.458			225.208	5.75
