# Supplementary material for: Overcoming the cytoplasmic retention of GDOWN1 modulates global transcription and facilitates stress adaptation
Source: eLife journal article supplement (doi:10.7554/elife.79116), 2022-11-22
Supplement: fig6-data1 [file Figure 6 source data 1.xlsx]

## Sheet: iGDOWN1-Venus
iGDOWN1-Venus
ROI	Cell population	Total EU intensity (FI)	Cell count	Averaged EU per cell	Relative EU signal (Venus+ / Venus-)	Mean	SE
1	Total	55403014	32	1.73134e+06		0.943961	0.0510717
	Venus+	16272234	10	1.62722e+06	0.914853
	Venus-	39130780	22	1.77867e+06
2	Total	62424333	43	1.45173e+06
	Venus+	16245682	13	1.24967e+06	0.811848
	Venus-	46178651	30	1.53929e+06
3	Total	56509177	39	1.44895e+06
	Venus+	17667816	12	1472318	1.02346
	Venus-	38841361	27	1.43857e+06
4	Total	54558554	30	1.81862e+06
	Venus+	20327163	11	1.84792e+06	1.02568
	Venus-	34231391	19	1.80165e+06

## Sheet: iGDOWN1(10M)-Venus
iGDOWN1(10M)-Venus
ROI	Cell population	Total EU intensity (FI)	Cell count	Averaged EU per cell	Relative EU signal (Venus+ / Venus-)	Mean	SE
1	Total	26353090	27	976040		0.348256	0.0329176
	Venus+	13615275	21	648346	0.305396
	Venus-	12737815	6	2.12297e+06
2	Total	32820445	32	1.02564e+06
	Venus+	16268900	24	677871	0.327641
	Venus-	16551545	8	2.06894e+06
3	Total	38984688	33	1.18135e+06
	Venus+	22826787	27	845437	0.31394
	Venus-	16157901	6	2.69298e+06
4	Total	37174513	30	1.23915e+06
	Venus+	17527252	20	876363	0.446048
	Venus-	19647261	10	1.96473e+06

## Sheet: iNLS-GDOWN1-Venus
iNLS-GDOWN1-Venus
ROI	Cell population	Total EU intensity	Cell count	Averaged EU per cell	Relative EU signal (Venus+ / Venus-)	Mean	SE
1	Total	51954675	33	1.57438e+06		0.931237	0.108569
	Venus+	20642119	15	1.37614e+06	0.791074
	Venus-	31312556	18	1.73959e+06
2	Total	29259946	22	1.33e+06
	Venus+	16123490	14	1.15168e+06	0.701363
	Venus-	13136456	8	1642057
3	Total	52115471	33	1.57926e+06
	Venus+	13858236	8	1.73228e+06	1.13199
	Venus-	38257235	25	1.53029e+06
4	Total	42137442	29	1.45302e+06
	Venus+	24240751	16	1.51505e+06	1.10052
	Venus-	17896691	13	1.37667e+06

## Sheet: iNLS-GDOWN1(10M)-Venus
iNLS-GDOWN1(10M)-Venus
ROI	Cell population	Total EU intensity	Cell count	Averaged EU per cell	Relative EU signal (Venus+ / Venus-)	Mean	SE
1	Total	33728908	24	1.40537e+06		0.156769	0.0372251
	Venus+	1580286	7	225755	0.119378
	Venus-	32148622	17	1.8911e+06
2	Total	27031863	26	1.03969e+06
	Venus+	2180119	8	272515	0.197381
	Venus-	24851744	18	1.38065e+06
3	Total	31804737	32	993898
	Venus+	635094	7	90727.7	0.0727693
	Venus-	31169643	25	1.24679e+06
4	Total	27151101	37	733814
	Venus+	1926044	9	214005	0.237547
	Venus-	25225057	28	900895
