# Supplementary material for: Overcoming the cytoplasmic retention of GDOWN1 modulates global transcription and facilitates stress adaptation
Source: eLife journal article supplement (doi:10.7554/elife.79116), 2022-11-22
Supplement: fig6-data3 [file Figure 6 source data 3.xlsx]

## Sheet: Sheet1
Optical density
			iGDOWN1-V-F			iGDOWN(10M)-V-F					iNLS-GDOWN1-V-F			iNLS-GDOWN1(10M)-V-F
		background	T	C	N	T	C	N		background	T	C	N	T	C	N
	H3	157	44737	---	42529	41492	---	39770		0	48921	---	31964	40968	---	48727
	RPB1	622	27880	5673	16109	15189	5920	7162		813	33658	6807	19155	21068	3740	13021
Background removal
			iGDOWN1-V-F			iGDOWN(10M)-V-F					iNLS-GDOWN1-V-F			iNLS-GDOWN1(10M)-V-F
			T	C	N	T	C	N			T	C	N	T	C	N
	H3		44580	---	42372	41335	---	39613			48921	---	31964	40968	---	48727
	RPB1		27258	5051	15487	14567	5298	6540			32845	5994	18342	20255	2927	12208
Relative expression level of RPB1 (RPB1/H3)
			iGDOWN1-V-F			iGDOWN(10M)-V-F					iNLS-GDOWN1-V-F			iNLS-GDOWN1(10M)-V-F
	RPB1/H3		0.61144	---	0.365501	0.352413	---	0.165097			0.671389	---	0.573833	0.49441	---	0.250539
			The values highlighted in yellow were used to generate the bar graph in Figure 6B.
