# Supplementary material for: Overcoming the cytoplasmic retention of GDOWN1 modulates global transcription and facilitates stress adaptation
Source: eLife journal article supplement (doi:10.7554/elife.79116), 2022-11-22
Supplement: fig6-figsupp1-data2 [file Figure 6-figure supplement 1-source data 2.xlsx]

## Sheet: Sheet1
Optical density
			iGDOWN1-V-F			iGDOWN(10M)-V-F					iNLS-GDOWN1-V-F			iNLS-GDOWN1(10M)-V-F					HeLa -LMB			HeLa +LMB
		background	T	C	N	T	C	N		background	T	C	N	T	C	N		background	T	C	N	T	C	N
	H3	301	52827	---	47151	62245	---	84255		541	27176	---	31031	35929	---	33663		561	28330	---	25997	28524	---	35534
	RPB1	768	35764	9076	18939	34176	12090	20038		107	18885	5904	12114	13685	3142	7084		72	18393	4524	12778	20615	17284	10207
Background removal
			iGDOWN1-V-F			iGDOWN(10M)-V-F					iNLS-GDOWN1-V-F			iNLS-GDOWN1(10M)-V-F					HeLa -LMB			HeLa +LMB
			T	C	N	T	C	N			T	C	N	T	C	N			T	C	N	T	C	N
	H3		52526	---	46850	61944	---	83954			26635	---	30490	35388	---	33122			27769	---	25436	27963	---	34973
	RPB1		34996	8308	18171	33408	11322	19270			18778	5797	12007	13578	3035	6977			18321	4452	12706	20543	17212	10135
Relative expression level of RPB1 (RPB1/H3)
			iGDOWN1-V-F			iGDOWN(10M)-V-F					iNLS-GDOWN1-V-F			iNLS-GDOWN1(10M)-V-F					HeLa -LMB			HeLa +LMB
	RPB1/H3		0.666261	---	0.387855	0.539326	---	0.22953			0.705012	---	0.393801	0.383689	---	0.210645			0.659764	---	0.499528	0.734649	---	0.289795
			The values highlighted in yellow were used to generate the bar graph in Figure 6——figure supplement 1B.
