# Supplementary material for: Overcoming the cytoplasmic retention of GDOWN1 modulates global transcription and facilitates stress adaptation
Source: eLife journal article supplement (doi:10.7554/elife.79116), 2022-11-22
Supplement: fig6-figsupp1-data3 [file Figure 6-figure supplement 1-source data 3.xlsx]

## Sheet: iGDOWN1-Venus
Criteria for defining Venus+ cells: Area(Venus)>1000 (arbitrary units) and Integral intensity of Venus>10000 (arbitrary units)
Criteria for defining Venus- cells: Area(Venus)<1000 (arbitrary units) or Integral intensity of Venus<10000 (arbitrary units)
Red signals: Intensity of RPB1 (detected by the indicated antibodies)
iGDOWN1-Venus-Flag
Signals of RPB1 (un-phos, indicated by the 8WG16 antibody)									Signals of RPB1 (S2P, indicated by the S2P antibody)									Signals of RPB1 (S5P, indicated by the CTD4H8 antibody)
Venus- population									Venus- population									Venus- population
# of Field	Serial No. of cells	Size	Mean[Red]	Area(Venus)	Integral intensity of Venus	Averaged Mean (Red)	SE(Red)		# of Field	Serial No. of cells	Size	Mean[Red]	Area(Venus)	Integral intensity of Venus	Averaged Mean (Red)	SE(Red)		# of Field	Serial No. of cells	Size	Mean[Red]	Area(Venus)	Integral intensity of Venus	Averaged Mean (Red)	SE(Red)
1	1	139.7	23213	0	0	15068.4	738.812		2	1	102.2	6878	0	0	9340.67	271.539		1	1	117.4	6992	0	0	7401.24	247.996
	3	103.1	23744	0	0					3	140.9	9849	0	0					3	106.8	687	0	0
	5	153.2	18195	0	0					11	106.7	9486	0	0					4	116.6	8844	0	0
	11	145.3	17780	0	0					17	142.1	9016	0	0					5	120.6	4294	0	0
	2	112.6	20260	1	4864					24	126.5	10514	0	0					7	135.9	9681	0	0
2	7	101.4	14843	0	0					26	126.2	9948	0	0					9	103.3	4308	0	0
	8	131	11437	0	0					28	124.9	8559	0	0					10	125.2	9984	0	0
	9	123.6	13824	0	0					29	131	9655	0	0					11	120.7	8813	0	0
	6	157.4	12326	293	2383872					2	151.5	5734	88	351232					16	119.4	9410	0	0
	4	163.8	12513	557	5342976					22	102	8117	204	870656					23	117.6	8643	0	0
3	2	118.7	14602	0	0				3	1	117.5	10116	0	0					25	138.2	6120	0	0
	3	132.6	9583	0	0					2	111.7	10277	0	0					28	140.7	8921	0	0
	4	138.4	10263	0	0					5	133.6	9529	0	0					32	140.4	8759	0	0
	8	105.1	15356	0	0					6	109.8	10784	0	0					27	109.6	5952	102	749824
	10	119.8	9780	0	0					14	137.4	9905	0	0				2	5	129	6428	0	0
	11	108.5	14981	0	0					16	127.9	7691	0	0					6	146.3	6729	0	0
	14	109.9	17906	0	0					24	120.3	8698	73	258560					7	123	7185	0	0
	15	140.5	16664	0	0				4	7	141.3	10554	0	0					8	137	6512	0	0
0	2	113.4	14680	0	0					11	126.4	9676	0	0					9	116	7952	0	0
	4	146	12438	0	0					12	131.7	9796	0	0					17	122.9	5242	0	0
	9	145.3	13518	0	0					14	101.9	9719	0	0					19	137.6	6154	0	0
	15	108.1	16553	0	0					17	142.4	9023	0	0					20	131.7	4479	0	0
	16	121.7	12292	0	0					20	141.7	11855	0	0					21	125.2	6476	0	0
	17	112.3	15855	0	0					21	141.7	11367	0	0					23	125.8	8407	0	0
	13	154.5	14105	171	545280					19	120.8	11903	64	419072					24	104.3	7499	0	0
									0	1	100.7	12521	0	0					14	152.7	7456	619	7855104
										7	130.1	6079	0	0					15	125	5031	878	10967296
										24	117.2	6943	0	0				3	1	109.9	5673	0	0
										25	138.7	8426	0	0					2	124.7	7471	0	0
										28	118	8819	0	0					3	119.8	7792	0	0
										30	143.1	8514	0	0					10	115.5	6019	0	0
										32	112	9106	0	0					11	107.7	7162	0	0
										9	140	9185	496	2794752					14	143.6	9403	0	0
																			15	135	7576	0	0
																			16	140.4	8366	0	0
																			17	138.2	8148	0	0
																			21	137.6	9310	0	0
																			22	136.1	9205	0	0
																			23	128.7	9247	0	0
																			26	127.1	6583	0	0
																		4	7	138	6883	0	0
																			8	126.5	9279	0	0
																			11	137.9	6478	0	0
																			15	122.9	9224	0	0
																			16	109.9	7298	0	0
																			17	134.4	6842	0	0
																			20	119.6	9168	0	0
																			24	103.8	7918	0	0
																			27	122.7	9208	0	0
																			30	110.2	8646	0	0
																			18	131.1	7606	302	2692096
Venus+ population									Venus+ population									Venus+ population
# of Field	Serial No. of cells	Size	Mean[Red]	Area(Venus)	Integral intensity of Venus	Averaged Mean (Red)	SE(Red)		# of Field	Serial No. of cells	Size	Mean[Red]	Area(Venus)	Integral intensity of Venus	Averaged Mean (Red)	SE(Red)		# of Field	Serial No. of cells	Size	Mean[Red]	Area(Venus)	Integral intensity of Venus	Averaged Mean (Red)	SE(Red)
1	4	126.9	20148	2390	10767104	16879.8	749.749		2	20	138.3	7692	1060	4287488	9517.88	195.575		1	21	132.4	6485	2550	26332160	6858.02	201.726
	8	140.1	20427	13100	60005632					27	118	7038	2860	11773440					15	128	3614	3710	38990848
	13	115.5	21539	14900	91319296					5	119	8879	16100	67009024					14	110.1	11905	3660	55298560
	6	129.3	22565	24300	95452928					25	115.2	9522	16100	69694464					30	111.3	10452	10800	128568064
	12	135.6	24753	23300	103215104					6	129.6	9402	20800	69810176					6	117.2	7591	17800	164247808
	10	131.2	25123	19600	103756800					16	138.9	8069	21100	77926144					18	116.4	7404	17000	164772864
	7	123.6	21028	24200	165297152					23	142.3	7543	23200	80952576					12	113.6	6387	17100	171269120
	9	121.9	18821	23800	180922112					21	115.9	9803	19500	82237184					19	121.7	7812	19100	191305472
2	1	126	16257	26500	244468480					18	137.9	10542	24800	86671616					24	128.4	6929	22400	192929536
	3	138.9	17376	30100	310522624					12	113.9	10043	15400	89230848					26	134	6982	26900	195222784
	2	144.9	18223	31100	324864256					19	128.9	9250	21800	91873280					13	122.9	5405	21100	200439552
	5	159.3	10922	29100	362861056					14	115.7	9653	18100	97268736					20	124.5	8146	20600	206166016
3	13	121.3	14487	5850	59672576					8	122.2	7658	19500	101039616					2	107.8	7040	21000	222093312
	12	145.6	11212	24900	155990784					9	134.4	9617	26000	108017408					22	122.6	6786	24700	226592256
	9	134.9	11590	23200	201207040					4	121.1	10418	24000	115414528					8	135.3	5176	19700	234120192
	7	107.2	17540	24800	273752832					13	124.4	10732	22600	125652992					29	114.9	7806	20900	235259392
	6	122.1	18105	22400	323743488					7	122.7	9368	22700	132231424					31	111.5	10675	19300	244827392
	1	150.9	12524	31000	326847488					10	129	11081	27600	150445568					17	130.2	6326	28200	329404416
	5	122.3	18335	47600	512571904					15	128	10792	32200	167548928				2	16	100.4	7477	5710	65542656
0	11	130.2	12551	2900	8654592				3	11	146	9319	4430	15843584					1	135.6	4320	5390	67984128
	5	108.1	9065	2350	9504000					8	102.6	8862	5170	19619328					11	141.6	5016	11400	160673792
	12	111.9	18096	6310	21286144					7	102.9	5317	5450	21166848					2	100.8	5836	11100	178339584
	1	106.1	15788	5910	24660480					4	128.3	9039	9570	35619840					13	110.4	7508	18900	185758720
	10	121.4	17111	13600	47009024					20	142.6	7685	11900	42792448					18	110.5	8101	22300	229029376
	14	131	15181	19100	56441856					15	149.6	7597	15700	60992000					4	123.6	7006	25200	347464448
	8	125.3	16308	19200	62593280					25	121.8	10402	15200	64799488					22	133.8	7331	37800	414772736
	6	132.9	15300	29000	110252544					3	153.2	10261	28600	74604800					10	154	4265	44200	582416128
	7	128.7	13445	31700	139348480					9	153	10563	34200	98921216					12	157.1	5077	55800	636147456
	3	140	15695	42100	163137536					22	136.8	11110	32900	108330752					3	141.9	4789	37700	698828544
										18	144	11261	37000	126002688				3	28	127.2	5481	1060	11058688
										19	141.3	10047	35400	126066176					27	118.2	6646	4570	63976960
										10	139.7	8953	30900	133361408					5	114.3	8234	6030	73516800
										23	118.3	11624	32700	157495552					6	100.5	7664	15500	168406016
										12	138.4	6377	29000	186876160					25	126.4	6198	24000	187041280
										17	127.7	11622	38600	197126144					7	127.3	8407	25600	206786048
										13	124.5	11346	44500	237198080					12	126.2	7871	28000	256056064
										21	143.7	10200	63500	303862016					4	132.1	9097	29800	259974656
									4	10	110.6	11781	2750	16731136					8	131.3	7953	32000	294238976
										1	146.7	8807	2930	16731904					20	127.6	7483	29200	307045632
										23	126.2	8945	7230	43406080					9	143.9	6842	34000	307415552
										13	116.1	11224	15200	73395456					13	130.1	6943	27800	314955264
										2	144.4	10099	10100	75071232					18	128.8	7410	31900	381919488
										15	109.1	12644	15500	83410944					24	151.2	5194	41600	574932992
										3	125.5	9407	17100	112490752					19	149.4	5385	42000	604757504
										8	111.5	10999	12800	123999744				4	1	106.2	7074	2020	16547584
										9	146.5	10475	29800	153501952					26	121.5	6201	3050	22139904
										18	137.4	7508	34200	222916864					12	131.9	6910	2910	23807232
										16	131.6	8222	30700	224268032					29	150.6	5173	9690	76824576
										6	111.7	2934	19900	241570816					13	101	7428	8530	102681088
										22	137.3	8438	35300	253293312					9	118.6	7765	16000	116270848
										24	127	9033	36800	288060160					2	131.4	3293	15600	127866368
										5	116.7	10696	32800	311708416					25	128.8	6040	15400	135319552
										4	121.7	10043	31700	328983808					5	132.2	8888	29200	209359360
									0	6	132	8312	1780	9116160					10	133.4	8482	26700	218456064
										31	125.6	12971	2410	13232640					6	128.8	7603	24600	294107392
										8	122.3	9503	3980	22692352					14	132.3	8016	27200	294458880
										17	119.8	7925	6380	35474944					3	117.1	6830	35000	375533312
										27	111.6	12701	14300	60817664					21	137.3	6908	30500	399893504
										26	109.8	11922	15800	73353728					22	136.8	4583	38100	488819200
										19	129.5	9611	15000	91380224					23	133.6	5977	31900	513566464
										22	119.5	7680	20300	94978304					4	138.6	7431	39400	530254336
										13	141.8	9654	24500	97022976					19	144.7	6271	34200	532884224
										14	118.7	9132	18600	109927168					28	137.9	4727	42000	569432320
										2	108.2	7108	12000	115814144
										29	121.4	11836	21600	121686272
										11	109.7	7557	15400	126258432
										10	126.7	9681	24200	135493632
										23	134.2	8488	25000	141180928
										20	118	10468	22000	144743936
										4	128.6	8969	24100	146067456
										21	125.7	12623	24500	147582464
										12	138.1	8201	25400	154354944
										3	129.7	9337	29300	162081536
										18	128.3	10538	28400	168075264
										16	131	9218	23000	179014144
										5	128	10244	29500	185939712
										15	120	9256	31200	231204608

## Sheet: iGDOWN1(10M)-Venus
Criteria for defining Venus+ cells: Area(Venus)>1000 (arbitrary units) and Integral intensity of Venus>10000 (arbitrary units)
Criteria for defining Venus- cells: Area(Venus)<1000 (arbitrary units) or Integral intensity of Venus<10000 (arbitrary units)
Red signals: Intensity of RPB1 (detected by the indicated antibodies)
iGDOWN1(10M)-Venus-Flag
Signals of RPB1 (un-phos, indicated by the 8WG16 antibody)									Signals of RPB1 (S2P, indicated by the S2P antibody)									Signals of RPB1 (S5P, indicated by the CTD4H8 antibody)
Venus- population									Venus- population									Venus- population
# of Field	Serial No. of cells	Size	Mean[Red]	Area(Venus)	Integral intensity of Venus	Averaged Mean (Red)	SE(Red)		# of Field	Serial No. of cells	Size	Mean[Red]	Area(Venus)	Integral intensity of Venus	Averaged Mean (Red)	SE(Red)		# of Field	Serial No. of cells	Size	Mean[Red]	Area(Venus)	Integral intensity of Venus	Averaged Mean (Red)	SE(Red)
1	2	157.1	19288	0	0	15889.4	727.38		2	1	150.3	13103	0	0	12467.3	442.612		1	1	105.5	11036	0	0	9664.22	373.86
	8	153.4	17847	0	0					4	139.4	15835	0	0					4	132.8	11265	0	0
	10	150.7	18104	0	0					7	141.2	13907	0	0					7	152.8	9829	0	0
	14	157.9	18172	0	0					9	158.8	13442	0	0					8	141.1	9716	0	0
	17	126.1	18017	0	0					17	136.4	17975	0	0					12	128.9	11943	0	0
	6	149.3	20011	33	213504					18	135.4	15479	0	0					5	145	5606	412	1316864
2	6	140.1	11223	0	0					20	127.4	16727	0	0					18	154.5	9983	989	3001088
	8	138.3	11085	0	0					22	109.5	19066	3	13568				2	2	151.1	11140	0	0
	9	134.1	11467	0	0					6	136.4	11645	36	194304					6	142.1	9810	0	0
	10	142.3	10351	0	0					5	165.2	9240	81	425728					12	121.6	7689	0	0
	11	148	12052	0	0					2	141	12772	142	763136					14	117.7	9137	0	0
	12	138.7	11248	0	0					12	115.6	10805	212	999936					18	107.8	9606	19	88320
	13	137.8	10455	0	0				3	7	145	14103	0	0					3	131.3	11500	187	1168640
	17	154.3	11558	0	0					9	126.9	11930	0	0					16	136.8	12411	604	2901760
	21	145.2	11136	0	0					10	150.1	12645	0	0					13	136.3	11855	893	4235776
	15	146.3	11104	502	2622208					12	128.1	12177	0	0				4	3	136.6	8364	0	0
4	13	140.4	19833	0	0					19	146.9	11215	507	1264640					7	132.8	7405	0	0
	16	142.4	18482	0	0				4	1	103.4	9316	0	0					10	129.8	11306	0	0
	14	132.8	14069	28	133120					10	120.2	10119	0	0					14	137.4	10906	0	0
	4	147.2	19407	211	2232832					11	136	12051	0	0					15	130.5	9956	0	0
0	10	155.7	17962	0	0					12	136.5	10874	0	0					18	139.5	11348	0	0
	11	160.1	17957	0	0					13	146.5	8567	0	0					19	128.8	8916	0	0
	12	135	19553	0	0					14	128.8	10907	0	0					23	101.6	6981	0	0
	14	136.5	22490	0	0					16	137.4	9579	0	0					8	119.9	3988	34	138752
	15	147	20107	0	0					20	135.4	8617	0	0					13	100.6	10907	61	275200
	16	154.3	17520	0	0					18	129.6	10632	669	4181919					1	140.6	2327	93	360960
	18	130.3	16749	0	0				0	5	140.7	10965	0	0					28	114.1	11461	128	519168
	17	165.6	17656	10	93696					7	148.8	11048	0	0				0	2	122.5	11932	0	0
										8	130.3	13806	0	0					4	126.2	11506	0	0
										9	155.1	14217	0	0					5	128.3	10635	0	0
										11	168.8	12575	0	0					7	128.8	11298	0	0
										13	110.9	13418	0	0					1	128	8125	12	39936
										15	144	12665	0	0					6	141	9235	9	41984
																			8	133.1	9832	43	148480
																			11	130.6	9009	152	563968
																			3	147.2	9949	191	681472
Venus+ population									Venus+ population									Venus+ population
# of Field	Serial No. of cells	Size	Mean[Red]	Area(Venus)	Integral intensity of Venus	Averaged Mean (Red)	SE(Red)		# of Field	Serial No. of cells	Size	Mean[Red]	Area(Venus)	Integral intensity of Venus	Averaged Mean (Red)	SE(Red)		# of Field	Serial No. of cells	Size	Mean[Red]	Area(Venus)	Integral intensity of Venus	Averaged Mean (Red)	SE(Red)
1	16	125.8	17373	21600	90123264	14402.1	712.497		2	3	135.5	12795	2010	9635072	9725.78	409.337		1	16	137.8	10406	1390	4416256	6727.84	434.543
	9	133.8	19366	29000	133869824					19	130.6	13047	4410	25265408					14	110.2	5760	7120	21865984
	7	127.4	21654	32300	149661184					8	147.4	13272	6540	31200000					3	133	7557	8640	26581248
	4	137.1	19003	28500	165711616					11	141.3	13263	8650	49809664					2	132.6	7634	22900	77756928
	12	119.6	21658	29700	173228032					10	127.9	15129	20600	131764480					6	126.1	7979	32300	126509056
	3	105.6	17376	27300	174476800					14	102.2	7220	24000	146664192					17	148	3706	39300	136612096
	5	140.2	21360	33600	189389056					21	110.6	13666	34900	204316928					10	132.1	4381	33900	137064448
	11	146.7	16482	41100	359582464					15	117.8	13234	30100	208239616					20	101.6	5980	17900	146855936
	15	153.9	14290	80700	593242368					16	163.2	6289	48200	267213568					19	139.8	6411	42900	170117376
	1	156.3	11754	82000	619978496					13	178.8	4096	48700	699824128					13	179	4977	60300	197314304
	13	133.3	16314	65500	631002368				3	16	113.8	13006	1510	5713152					15	125.2	4004	59000	270543104
2	7	143.9	10122	1920	8683776					21	113.5	10876	2910	10656000				2	7	140.8	10651	2100	12101632
	14	101.3	6469	13500	69390848					8	122.5	7969	6870	15749888					17	136.5	5010	5010	39175424
	5	144.1	10435	34600	146071296					4	140.3	4620	16600	56776448					1	102.3	12003	12700	66607104
	1	106.4	9177	20400	165523456					17	133.5	9345	29600	74386432					4	140.6	11183	37900	214167552
	16	137.4	9544	33100	176744448					6	127.2	11585	27700	75471616					11	135.4	9850	33100	243287040
	4	107.2	9717	25600	179894784					3	142	12966	39800	103806208					15	147.1	3301	43000	246573568
	18	131.3	8534	33000	182773504					15	139.7	13319	39800	125541888					10	161.9	6556	45600	257655296
	22	111	11211	34600	245747200					13	150.2	8742	54200	147540736					8	157	2395	52900	260299776
	2	161.1	7651	62900	251199488					18	147.5	6248	33400	166064384					9	131.9	10227	33700	274132992
	19	133.8	11071	44600	298886912					20	162.2	6498	47400	168115712					5	148.4	6399	60700	402394112
	3	141.4	9387	41500	364186880					2	147.4	8168	43500	173869056				4	17	145.3	11820	2970	11278080
	20	187.6	8919	78100	486385664					5	147.7	10113	40400	179712256					20	112.4	10427	3710	14125824
4	1	147.8	20463	3040	12489472					11	173.9	2946	51500	183510272					11	160.6	5704	3910	14412544
	15	148.2	15778	5540	22339328					14	129.8	11819	36400	185428992					27	100.4	1852	5710	20951808
	6	147.9	24011	15700	68358144					22	124.8	12163	44300	196855040					12	152.3	8064	5750	21220096
	12	152.1	16921	23200	97331200					23	138.8	6580	41300	210868736					21	137.6	10503	11500	44280320
	7	121.9	21966	20800	98360832					1	133	8828	57600	267173376					9	103.3	9211	12400	50767872
	8	148.7	16413	29800	146394880				4	22	128.9	11286	1580	10270000					2	107	7963	13200	53782528
	5	136	17122	31500	147147264					4	106.5	10315	1860	7758060					6	108	8596	14700	62872320
	2	144.6	19616	39400	179214592					9	156.5	8555	6390	33732810					5	110.5	6305	14000	63036416
	10	146.5	20720	36700	211355648					19	130.6	10158	24100	125609200					24	111.8	1679	16400	108704000
	9	143.8	16342	58200	369638144					5	112.8	6761	27100	178480600					16	143.6	6776	30300	126793216
	11	137.9	12005	40900	452584192					2	125.3	11709	28400	170485200					22	144.1	6664	33400	173191168
	3	146.8	12763	71200	518468352					17	130.2	9893	28700	153286700					25	156.4	7659	37100	184557312
0	6	141.2	8195	17800	71124736					21	154.6	6562	36700	238917000					4	133	1395	29300	267711232
	2	120.7	15313	23200	95904256					6	141	9764	37800	219693600				0	9	107.7	7336	2870	9808128
	8	120.8	8611	19600	122390272					3	159.9	8062	43600	211242000					13	109.8	8069	2790	9964544
	13	115.7	10534	28700	168804352					7	144.4	9727	45800	276906800					16	151	9145	5700	20794880
	4	155.5	13055	44900	172459776					8	153.8	9002	49900	250997000					15	132.6	6027	3490	36601088
	7	139.7	13941	40200	176410112				0	19	129.7	9933	2110	7504896					14	141.7	8140	17100	84664064
	1	139.1	17658	28700	217802752					14	119	13934	1930	8823808					17	133.5	5479	25400	106742016
	9	155.9	12608	61600	289339392					1	130.4	10659	13500	47156480					12	153.1	2496	35700	167672064
	3	164.1	10792	59900	651395072					4	122.7	13180	19700	77385728					18	112.3	2259	20500	201167104
										17	130.7	11360	21600	84503552					10	187.1	2814	60400	258842368
										18	154.6	7808	37600	134653440
										16	129.7	12432	31400	143458560
										2	124.9	8012	50100	254292224
										6	164.5	5873	70200	274276352
										12	184.5	5651	56400	292786176
										3	138.8	7577	65200	315421952

## Sheet: iNLS-GDOWN1-Venus
Criteria for defining Venus+ cells: Area(Venus)>1000 (arbitrary units) and Integral intensity of Venus>10000 (arbitrary units)
Criteria for defining Venus- cells: Area(Venus)<1000 (arbitrary units) or Integral intensity of Venus<10000 (arbitrary units)
Red signals: Intensity of RPB1 (detected by the indicated antibodies)
iNLS-GDOWN1-Venus-Flag
Signals of RPB1 (un-phos, indicated by the 8WG16 antibody)									Signals of RPB1 (S2P, indicated by the S2P antibody)									Signals of RPB1 (S5P, indicated by the CTD4H8 antibody)
Venus- population									Venus- population									Venus- population
# of Field	Serial No. of cells	Size	Mean[Red]	Area(Venus)	Integral intensity of Venus	Averaged Mean (Red)	SE(Red)		# of Field	Serial No. of cells	Size	Mean[Red]	Area(Venus)	Integral intensity of Venus	Averaged Mean (Red)	SE(Red)		# of Field	Serial No. of cells	Size	Mean[Red]	Area(Venus)	Integral intensity of Venus	Averaged Mean (Red)	SE(Red)
1	1	101.8	10643	0	0	15605.9	647.191		1	4	150.1	12245	0	0	12873.3	943.883		2	1	100.8	5764	0	0	5857.61	183.475
	7	136.4	12499	0	0					7	112.9	21915	0	0					4	125.6	4718	0	0
	10	132.8	12102	0	0					9	131.6	18132	0	0					7	140.8	5475	0	0
	11	124.8	12436	0	0					14	145.8	13747	0	0					8	136	4305	0	0
	13	156.4	13256	0	0					17	135.5	14448	0	0					9	136.6	4633	0	0
	15	108.8	12534	0	0					19	138.7	16315	0	0					10	129.4	6259	0	0
	20	101.8	9201	0	0					27	132.1	12695	0	0					11	127.5	5593	0	0
2	1	117.1	21365	0	0					23	141.6	16624	941	10807296					12	129.5	5441	0	0
	4	122.9	18966	0	0				3	24	152.7	16358	0	0					13	138	4681	0	0
	6	127.4	20564	0	0					26	147.9	4811	0	0					15	119.3	6376	0	0
	7	126.5	21473	0	0					27	124.8	12420	0	0					17	119.3	6194	0	0
	8	144.8	19309	0	0					29	121.7	13941	0	0					18	132	5850	0	0
	15	127.1	17832	0	0					5	124.8	16869	337	2280960					14	130.4	5116	428	1502464
	19	131.8	22387	0	0				4	17	132.9	11690	0	0					24	134.2	4284	711	2626048
4	12	152.2	15771	0	0					21	135.5	7130	0	0				3	12	128.4	4822	0	0
	16	133.9	16417	0	0					22	141.1	10386	0	0					15	143.5	4724	0	0
	17	146.5	18577	0	0					25	122.5	1442	15	177664					16	122.6	4218	0	0
	18	131.1	18874	0	0					5	118.5	11339	59	230656					19	144.6	5431	0	0
	1	108.8	15801	564	4825344				0	1	141	13656	0	0					13	101.4	7749	78	1166592
0	4	144.1	16406	0	0					4	141.8	13793	0	0				4	3	120.6	6549	0	0
	6	136.8	16958	0	0					9	131.3	11646	0	0					4	125	7584	0	0
	7	121.8	16324	0	0					12	136.2	11611	0	0					5	119.6	6926	0	0
	8	126.7	15935	0	0														7	132.2	7737	0	0
	13	121.9	11731	0	0														10	116.2	5126	0	0
	16	136.5	13455	0	0														12	127.4	6120	0	0
	17	147.6	12333	0	0														13	134.8	6574	0	0
	19	118.6	13964	0	0													0	1	132.9	3852	0	0
	20	128.4	12782	0	0														2	135.3	4377	0	0
	22	134.7	16886	0	0														4	124.6	7266	0	0
	24	106.9	11397	0	0														6	145.5	6898	0	0
																			7	110.3	5173	0	0
																			8	121.3	6090	0	0
																			12	132.4	6534	0	0
																			13	130	8067	0	0
																			16	131	6139	0	0
																			22	133.2	5852	0	0
																			26	137.4	7624	0	0
																			20	132.4	6468	164	207616
Venus+ population									Venus+ population									Venus+ population
# of Field	Serial No. of cells	Size	Mean[Red]	Area(Venus)	Integral intensity of Venus	Averaged Mean (Red)	SE(Red)		# of Field	Serial No. of cells	Size	Mean[Red]	Area(Venus)	Integral intensity of Venus	Averaged Mean (Red)	SE(Red)		# of Field	Serial No. of cells	Size	Mean[Red]	Area(Venus)	Integral intensity of Venus	Averaged Mean (Red)	SE(Red)
1	14	131	11579	1470	17361664	15720.4	422.648		1	1	127.5	15042	3820	32172288	13060	341.731		2	29	112.8	4346	17000	47166976	5515.52	161.821
	4	146	12119	2170	25058560					24	138.6	14763	4580	46389760					23	100.7	6950	15300	59256064
	9	103.2	10796	2900	33027840					13	125.9	14030	6430	56047360					25	105.1	5354	18400	79284480
	17	130.8	11415	4340	47678976					3	140	16770	18700	110361856					28	125.5	4690	19200	80187136
	16	135.1	11821	4900	60377088					2	114.3	2916	12400	126015488					30	112.4	7206	20800	88580608
	19	119.2	11170	11100	90244864					11	113.6	13295	12900	137814528					16	116.4	5929	17100	97437440
	5	136.2	11098	15900	107123200					8	138	10125	25600	185450240					26	107	5365	19000	118987776
	8	126.8	13410	14100	109751552					10	134.7	11703	22300	218303232					2	134.6	3495	33900	140378624
	6	145.3	13472	19500	118940928					5	126	15827	26400	246436608					20	126.2	5365	30300	151417344
	12	131.9	11986	16100	131439104					16	131	12972	24300	247214848					19	135.2	6777	28500	163803392
	18	131.9	11986	16300	147339776					21	147.9	14857	33100	271321344					21	128.2	5242	29800	176677888
	3	140.5	11658	24900	192881152					18	131.4	11340	29400	274251776					6	140.5	4249	37700	221620736
	2	139.4	12069	72700	1247144960					22	136	14124	31700	283871744					22	138	4050	47900	226102016
2	14	127.7	17283	24000	198340352					15	134.6	11706	29300	287784448					5	139.5	4195	37600	226157312
	18	133.7	19517	25600	227187968					6	133.9	15537	28000	316347136					3	141	4722	46100	274322688
	10	104	21504	26100	274968320					20	140.5	13082	34800	329789952				3	18	112.4	3707	2810	18743552
	17	126.8	25222	32200	292769024					12	157.9	7667	35800	345740032					24	127.2	3456	1260	20027392
	3	122.8	20244	15300	294763008					26	143	9549	40800	445574656					10	120.6	5811	1740	25752320
	16	135.5	17072	29100	295808512					25	149.7	16013	37000	510890752					17	120.2	3525	6390	49788160
	13	146.3	19677	43400	334523136				3	2	110	18885	6610	54801920					11	107.2	5268	7170	61539840
	20	121.9	18191	28500	336024832					6	116.5	18981	15700	88877824					25	110.8	6345	9520	73192704
	2	130.6	15927	30900	355824128					11	132.1	10250	14900	120695552					27	108.4	2407	9090	78202880
	12	123.5	20320	39500	427190016					28	113.4	11015	14700	121721856					23	140.1	5412	17300	97437184
	9	139.6	17068	48900	476964096					25	118.5	15303	18400	130233088					9	114.5	6962	18100	133215232
	5	139	18111	65600	1152924416					9	135.1	14746	18500	132886784					20	128.2	5858	21200	144918016
	11	129.4	15443	57200	1586938880					1	100.5	3885	14000	138495744					1	119.3	7840	19300	150359296
4	8	149.6	16388	27700	166847488					16	138	13425	21900	152366080					4	123.7	5766	22800	191756032
	14	147.7	15697	28000	187077376					4	113.8	13337	18400	164036352					2	128.6	6037	24000	201265408
	23	109.9	17733	17800	192591360					7	131.9	15994	26000	201377792					22	135.7	2954	28300	259035392
	15	143.1	17243	30600	210331392					30	127.9	16960	26500	202743296					21	139.9	4290	33200	282408704
	22	124.8	18299	21500	248375296					13	140.3	16161	30500	207620608					3	145.2	5233	33400	401137664
	9	151.2	17259	38500	272426240					10	139.2	16681	28300	211299584					8	132.5	5638	32500	434171904
	11	127.5	19453	30500	276388352					8	130.9	11483	31300	234001920					14	149.9	4364	46500	434724096
	2	121	16557	34200	300239360					12	141.6	14187	28400	241858560					5	141.8	4008	34600	447734272
	6	130.8	15902	30500	301154816					3	122.3	13366	21500	246714880					6	137.6	5666	37100	575329792
	21	137.7	16259	40200	328919296					14	126.9	14953	31900	289495296					18	110.3	6939	1460	4655360
	20	124.1	17891	28200	330066432					18	151	14074	38900	312131328					14	131.3	6625	3400	11635712
	5	134	16795	32100	336292352					19	133.8	15528	41200	346226688				4	6	130.5	6890	19000	58777088
	7	139.3	20471	36900	360992768					21	138.9	14117	31000	455434752					1	121.6	6066	8920	97174528
	13	132.2	18906	42700	383177984					17	147.7	12658	29400	491340800					15	135.4	6695	30400	103188224
	3	128.1	20130	37600	487200768				4	1	118.9	11427	1090	6961408					17	133.4	5562	35700	127992320
	10	169.7	13925	51900	525359360					14	113.7	10874	6370	36007680					19	130	5863	26800	146603008
	4	101.7	16156	41300	544822272					16	135	6680	8580	48727552					11	135.2	7641	32300	164405248
0	14	157.4	16245	1260	11311360					6	126.2	10406	12600	59572992					9	118.9	6375	22600	166072832
	9	124.9	14110	10800	78829824					12	121.3	13805	12800	62267648					20	139.2	6480	59100	226141696
	3	112.9	14376	14800	95306496					11	123.2	13747	13800	64934400					2	125.5	6488	27200	265162240
	18	118.3	14382	9490	101950464					15	122.9	11690	18100	102030848					8	149.3	7408	56400	292379136
	1	101.5	13987	13500	111427072					20	132.3	9470	21500	110407168					25	130.9	5527	2320	20636160
	23	137.7	14217	22500	152586240					24	124.4	11206	15000	112503296					17	107.1	6155	13000	22763264
	5	129.7	13849	27700	207748096					9	102.2	10717	17100	118102272				0	15	112.8	7755	14600	28839424
	2	144.2	15862	30600	215096320					7	123.7	14006	19800	166328576					23	108.4	6593	15900	30011648
	21	131.5	12140	33000	240009984					2	121.2	11558	19900	177904128					9	131.8	4730	21600	37307392
	11	124.4	12805	37100	253466368					10	119.3	14934	20800	196965376					3	121.6	7531	15500	60116736
	12	132.1	15891	27600	335323648					13	142.7	10339	31600	197797376					11	136.7	5574	34800	69392640
	15	149.2	14276	33500	403489024					3	129.4	12873	27900	200028672					19	129	3704	29300	71361024
	10	130.3	12978	38100	735312896					8	139	13516	37600	236891136					5	135.9	6158	30100	74422528
										4	128.4	12721	28600	316547840					14	137.6	5178	30200	76265984
										23	144.3	13544	40900	338697472					10	133.8	5977	43900	99146752
										8	133.1	13079	8350	60199424					24	166.2	4638	20800	141584896
										17	147.5	17796	19900	102152960					18	119.8	4666	27800	168297216
										5	124.5	12819	19800	160791808					21	122.6	4747	37100	360240640
									0	6	110.4	10366	19300	173289472
										18	126.7	8876	26300	188770304
										16	146.1	14578	31500	194413312
										20	125.4	17172	29200	201556992
										15	120.6	11184	27400	211475712
										14	131.9	14657	33500	230299136
										13	119.6	13966	29800	248193792
										3	128.3	15306	34100	250535424
										19	123.2	10670	29700	291265792
										2	133.3	14212	43800	363963648
										11	141.2	10423	40500	375956480
										7	148.1	12338	45600	456028672
										10	148.6	17000	51700	508968448
										21	141	14236	48800	558520320

## Sheet: iNLS-GDOWN1(10M)-Venus
Criteria for defining Venus+ cells: Area(Venus)>1000 (arbitrary units) and Integral intensity of Venus>10000 (arbitrary units)
Criteria for defining Venus- cells: Area(Venus)<1000 (arbitrary units) or Integral intensity of Venus<10000 (arbitrary units)
Red signals: Intensity of RPB1 (detected by the indicated antibodies)
iNLS-GDOWN1(10M)-Venus-Flag
Signals of RPB1 (un-phos, indicated by the 8WG16 antibody)									Signals of RPB1 (S2P, indicated by the S2P antibody)									Signals of RPB1 (S5P, indicated by the CTD4H8 antibody)
Venus- population									Venus- population									Venus- population
# of Field	Serial No. of cells	Size	Mean[Red]	Area(Venus)	Integral intensity of Venus	Averaged Mean (Red)	SE(Red)		# of Field	Serial No. of cells	Size	Mean[Red]	Area(Venus)	Integral intensity of Venus	Averaged Mean (Red)	SE(Red)		# of Field	Serial No. of cells	Size	Mean[Red]	Area(Venus)	Integral intensity of Venus	Averaged Mean (Red)	SE(Red)
2	4	135.6	14253	0	0	13438.4	368.258		1	4	103.2	2759	0	0	9093	482.374		2	1	123.2	8127	0	0	8620.64	315.71
	8	134.2	14693	0	0					11	143.1	8607	0	0					2	122.3	8562	0	0
	1	133.1	11990	8	32000					13	126.7	8816	0	0					4	137.6	8789	0	0
	12	136.6	12509	4	47616					14	144.1	6127	0	0					5	137.8	7455	0	0
	6	155.4	13130	34	195584					15	127.6	8632	0	0					6	143.7	7149	0	0
	5	132.3	14446	45	196352					17	128.2	8088	0	0					7	136.4	8673	0	0
	3	152.9	13530	274	1256704					18	105.2	7279	0	0					8	147.7	7939	0	0
3	5	142.3	11340	0	0					1	141.6	8719	2	4352					11	140.1	8747	0	0
	6	133.7	12396	0	0				3	2	147.9	6833	0	0					13	136.4	7048	0	0
	7	131.9	12684	0	0					8	139.3	6389	0	0					15	144.1	6279	0	0
	9	141.2	12415	0	0					9	113.9	10777	0	0					16	116.2	10065	0	0
	10	133.8	11035	0	0					10	149.6	7646	0	0				3	4	120.9	8458	0	0
	11	131.4	12225	0	0					14	150.2	7937	0	0					5	126.9	9945	0	0
	15	121.2	15431	0	0					15	141.1	8249	0	0					6	132.9	6185	0	0
	16	116.6	13548	0	0					18	101.8	5360	0	0					7	139.9	11346	0	0
	14	131.7	8523	1	5376					21	101.4	7188	0	0					9	130.6	10315	0	0
4	2	147.7	12951	0	0					1	140.6	9580	1	4608					10	118.7	10101	0	0
	5	132.6	12285	0	0					20	157.8	142	2	23808					11	131.4	9033	0	0
	7	139.3	12609	0	0				4	1	133.3	12626	0	0					13	121.8	5275	63	339968
	8	137.8	15942	0	0					3	119	12326	0	0				4	8	130.9	12925	0	0
	10	124.4	14694	0	0					5	133.5	12276	0	0					10	128.1	11876	0	0
	11	106.7	11942	0	0					6	115.6	8527	0	0					13	139.6	10571	0	0
	15	157.2	10736	0	0					7	129.2	11876	0	0					14	144.7	11237	0	0
	1	100.9	13107	1	3840					8	141.6	9334	0	0					11	145.1	11207	280	3033344
	9	131.8	8057	43	256768					9	123.8	10727	0	0				0	2	101.1	7861	0	0
0	3	124.8	13241	0	0					12	132.8	11879	0	0					3	130.7	8789	0	0
	4	124.5	13316	0	0				0	1	140.1	6103	0	0					4	102	6059	0	0
	5	135.9	11798	0	0					4	145	12934	0	0					6	129.7	10880	0	0
	6	124.6	14277	0	0					6	137.5	13659	0	0					9	146.5	9328	0	0
	8	117.3	16642	0	0					8	154.2	12195	0	0					11	152.9	8591	0	0
	9	161.8	13976	0	0					10	131.4	12461	0	0					12	174.6	6419	0	0
	11	129.9	17076	0	0					11	123.9	8724	0	0					13	139.4	7519	0	0
	12	123.6	16600	0	0					14	133	9374	0	0					14	109	6174	0	0
	14	149.9	15811	0	0					7	130.7	7677	1	3584					15	138.9	7572	0	0
	15	140.5	17947	0	0					17	126	12492	1	3584					16	130.4	7800	0	0
	13	149	16626	1	18176					18	127.3	10860	1	5120					18	100.4	6044	0	0
										12	109.9	11263	4	15616
Venus+ population									Venus+ population									Venus+ population
# of Field	Serial No. of cells	Size	Mean[Red]	Area(Venus)	Integral intensity of Venus	Averaged Mean (Red)	SE(Red)		# of Field	Serial No. of cells	Size	Mean[Red]	Area(Venus)	Integral intensity of Venus	Averaged Mean (Red)	SE(Red)		# of Field	Serial No. of cells	Size	Mean[Red]	Area(Venus)	Integral intensity of Venus	Averaged Mean (Red)	SE(Red)
2	10	112.1	8289	9400	46744320	7542.26	324.109		1	3	141.9	4379	12100	41501952	5739.43	431.697		2	12	143.7	2646	14400	86757376	3166.68	528.944
	11	148.8	7895	10500	47261184					12	137.1	5645	13400	52833024					14	175.1	1715	20800	119174912
	13	124.8	5617	20300	111636736					6	125	7710	12500	54866944					3	134.7	5458	12900	129711616
	9	170.6	7255	36600	214781440					9	151.6	5969	16300	73111040					10	130.8	2822	13000	157556736
	2	149	5967	48900	252135168					16	174.8	4685	16400	73255936					9	133.6	2430	14000	163918336
	7	174.7	6454	45600	409445120					2	171.8	4873	14300	90376960				3	3	172.7	1661	14700	100633088
3	13	131.5	12229	3690	47081472					8	108.9	9140	13000	92316160					8	137.7	2339	14100	127615488
	8	128	6618	11500	131549184					5	147.6	5072	25700	94125312					2	127.9	7660	12500	146390016
	12	113.2	7013	15100	166166016					7	139.1	9198	16100	134608640					12	140.3	5528	15000	203112448
	4	172.2	5765	21900	229683200				2	17	154.8	184	1580	13671424					1	153	986	20100	211840768
	1	190.5	5537	26600	299039744					11	157.2	2837	11900	72921600				4	15	108.8	10675	1330	20436480
	2	158.4	6503	14600	528930560					4	163.7	3933	19700	190278656					1	174.7	1202	19300	109016576
4	13	134.7	6930	10700	51867136					3	167.7	4628	20400	190424832					9	144.1	1699	15800	180399104
	19	136.7	7320	10700	62241792					7	161.9	6929	18200	258511360					12	135.9	6215	14000	267572992
	14	133.8	8978	8100	80310528					12	140.5	3729	15000	309096192					5	205.4	918	21700	280177664
	12	161.8	8944	14500	105117696				4	15	147.3	6015	14000	86746880					2	190.5	1534	26400	286038016
	3	145.9	6871	14200	105854720					10	133.5	7690	12500	145722368					7	157.8	1333	18200	414120960
	6	144.7	7008	15000	155249664					13	167.2	6823	14900	186498816				0	10	144.5	3740	11600	36174336
	4	147.9	7909	16300	213283584					14	130.4	2518	12600	205805824					7	130.4	1332	11700	50691840
	17	129.5	7440	11700	274934016					2	147.3	6582	16400	207582208					17	150.7	2708	14900	52205056
0	7	163.7	9457	13900	114687744					16	140.2	9027	15100	245830656					8	146.7	2637	15700	64346880
	10	173.6	7786	20200	150620416					11	128.1	9279	14400	248504064					1	155.4	2429	17000	90058752
	2	207.7	9687	24400	407860480				0	5	134	7505	11900	72832256
										15	136.2	5574	14300	107347712
										3	120.2	2155	16500	111284480
										9	149.7	5492	14600	115141120
										16	149.7	7815	15800	121610752
										2	135	5318	15300	311506176
