# Supplementary material for: Overcoming the cytoplasmic retention of GDOWN1 modulates global transcription and facilitates stress adaptation
Source: eLife journal article supplement (doi:10.7554/elife.79116), 2022-11-22
Supplement: fig7-data2 [file Figure 7-source data 2.xlsx]

## Sheet: Sheet1
	A2: NC Mock						A3: NC 0.1 mM NaAsO2						A4: NC 0.5 mM NaAsO2
	A2 Total	A2 ROI:1	A2 ROI:3	A2 ROI:4	A2 ROI:5	A2 ROI:6	A3 Total	A3 ROI:1	A3 ROI:2	A3 ROI:3	A3 ROI:4	A3 ROI:5	A4 Total	A4 ROI:1	A4 ROI:2	A4 ROI:3	A4 ROI:4	A4 ROI:6
The number of the total cells	8832	2038	1395	2362	1406	1631	7360	1575	1060	1521	1387	1817	8517	1559	1707	1705	1779	1767
The number of the SG+ cells	55	22	8	17	0	8	467	111	78	109	60	109	5448	970	1220	1168	819	1271
The mean intensity per SG	160	348	136	186	0	130	1728	1912	2159	1806	1176	1587	17797.4	15863	18791	19842	13809	20682
Ratio of the SG+ cells	0.00572638	0.0107949	0.00573477	0.00719729	0	0.00490497	0.0637945	0.0704762	0.0735849	0.0716634	0.0432588	0.059989	0.640322	0.622194	0.714704	0.685044	0.460371	0.719298
	B2: sg7 Mock						B3: sg7 0.1 mM NaAsO2						B4: sg7 0.5 mM NaAsO2
	B2 Total	B2 ROI:2	B2 ROI:3	B2 ROI:4	B2 ROI:5	B2 ROI:6	B3 Total	B3 ROI:1	B3 ROI:2	B3 ROI:3	B3 ROI:4	B3 ROI:5	B4 Total	B4 ROI:1	B4 ROI:2	B4 ROI:3	B4 ROI:4	B4 ROI:5
The number of the total cells	6145	1365	1273	1390	854	1263	4391	903	841	865	963	819	6296	1099	1362	1285	1226	1324
The number of the SG+ cells	52	12	11	10	8	11	1294	273	257	210	275	279	3566	705	542	881	887	551
The mean intensity per SG	238.6	275	255	203	264	196	6945.8	7099	7334	5371	6942	7983	13790.2	15622	10198	15958	16722	10451
Ratio of the SG+ cells	0.00854071	0.00879121	0.00864101	0.00719424	0.00936768	0.00870942	0.295383	0.302326	0.305589	0.242775	0.285566	0.340659	0.572939	0.641492	0.397944	0.685603	0.723491	0.416163
	C2: sg8 Mock						C3: sg8 0.1 mM NaAsO2						C4: sg8 0.5 mM NaAsO2
	C2 Total	C2 ROI:1	C2 ROI:2	C2 ROI:3	C2 ROI:5	C2 ROI:6	C3 Total	C3 ROI:1	C3 ROI:2	C3 ROI:3	C3 ROI:4	C3 ROI:5	C4 Total	C4 ROI:1	C4 ROI:2	C4 ROI:3	C4 ROI:5	C4 ROI:6
The number of the total cells	9329	1994	1892	1654	1876	1913	5227	454	1038	1264	1179	1292	9342	1570	1863	2230	2016	1663
The number of the SG+ cells	49	7	7	15	17	3	1680	143	332	392	466	347	6096	933	1111	1405	1413	1234
The mean intensity per SG	147.2	97	99	249	249	42	8946.4	8744	9221	8515	10744	7508	15505.4	14098	14344	15014	16518	17553
Ratio of the SG+ cells	0.00538186	0.00351053	0.00369979	0.00906892	0.00906183	0.00156822	0.321755	0.314978	0.319846	0.310127	0.39525	0.268576	0.652718	0.594268	0.59635	0.630045	0.700893	0.742032
	A6: OE Mock						B6: OE 0.1 mM NaAsO2						C6: OE 0.5 mM NaAsO2
	A6 Total	A6 ROI:1	A6 ROI:2	A6 ROI:3	A6 ROI:4	A6 ROI:6	B6 Total	B6 ROI:2	B6 ROI:3	B6 ROI:4	B6 ROI:5	B6 ROI:6	C6 Total	C6 ROI:1	C6 ROI:2	C6 ROI:3	C6 ROI:5	C6 ROI:6
The number of the total cells	10622	1788	1957	1961	2041	2875	8593	1402	1922	1687	1731	1851	11640	2373	2214	2376	2471	2206
The number of the SG+ cells	20	3	1	6	6	4	160	23	42	14	45	36	5061	1140	1121	1240	952	608
The mean intensity per SG	48.8	42	13	73	80	36	400.4	345	485	171	591	410	9970.8	11440	11873	12399	8455	5687
Ratio of the SG+ cells	0.00191591	0.00167785	0.000510986	0.00305966	0.00293974	0.0013913	0.0184003	0.0164051	0.0218522	0.00829876	0.0259965	0.0194489	0.433899	0.480405	0.506323	0.521886	0.385269	0.275612
