# Supplementary material for: Overcoming the cytoplasmic retention of GDOWN1 modulates global transcription and facilitates stress adaptation
Source: eLife journal article supplement (doi:10.7554/elife.79116), 2022-11-22
Supplement: fig7-data3 [file Figure 7-source data 3.xlsx]

## Sheet: Sheet1
NaAsO2 0.2 mM
	HeLa NC				HeLa sg#7				HeLa sg#8				HeLa sg#10
Time(h:m:s)	The number of the total cells	The number of the dead cells (PI +)	Cell death rate	Cell viability rate	The number of the total cells	The number of the dead cells (PI +)	Cell death rate	Cell viability rate	The number of the total cells	The number of the dead cells (PI +)	Cell death rate	Cell viability rate	The number of the total cells	The number of the dead cells (PI +)	Cell death rate	Cell viability rate
0:00:00	9452	56	0.00592467	0.994075	20512	85	0.00414392	0.995856	15741	55	0.00349406	0.996506	15334	96	0.0062606	0.993739
0:30:00	9401	69	0.00733964	0.99266	20224	96	0.00474684	0.995253	15621	81	0.00518533	0.994815	15116	114	0.00754168	0.992458
1:00:00	9352	67	0.00716424	0.992836	20052	103	0.00513664	0.994863	15508	86	0.00554552	0.994454	15025	127	0.00845258	0.991547
1:30:00	9351	62	0.00663031	0.99337	19947	117	0.00586554	0.994134	15457	81	0.00524034	0.99476	14946	124	0.00829653	0.991703
2:00:00	9346	68	0.00727584	0.992724	19965	106	0.00530929	0.994691	15385	86	0.00558986	0.99441	14925	129	0.00864322	0.991357
2:30:00	9302	70	0.00752526	0.992475	19852	107	0.00538989	0.99461	15334	83	0.00541281	0.994587	14890	133	0.00893217	0.991068
3:00:00	9304	73	0.00784609	0.992154	19748	101	0.00511444	0.994886	15328	78	0.00508873	0.994911	14885	131	0.00880081	0.991199
3:30:00	9309	81	0.00870126	0.991299	19692	115	0.00583993	0.99416	15311	88	0.0057475	0.994252	14922	136	0.00911406	0.990886
4:00:00	9327	87	0.00932776	0.990672	19600	127	0.00647959	0.99352	15335	91	0.00593414	0.994066	14891	144	0.00967027	0.99033
4:30:00	9354	83	0.00887321	0.991127	19658	130	0.00661308	0.993387	15322	95	0.00620023	0.9938	14874	148	0.00995025	0.99005
5:00:00	9354	95	0.0101561	0.989844	19625	138	0.00703185	0.992968	15369	94	0.00611621	0.993884	14900	152	0.0102013	0.989799
5:30:00	9354	102	0.0109044	0.989096	19667	144	0.00732191	0.992678	15333	93	0.00606535	0.993935	14926	155	0.0103846	0.989615
6:00:00	9359	105	0.0112191	0.988781	19740	153	0.00775076	0.992249	15425	93	0.00602917	0.993971	14920	158	0.0105898	0.98941
6:30:00	9382	105	0.0111916	0.988808	19632	154	0.00784434	0.992156	15429	96	0.00622205	0.993778	14962	170	0.0113621	0.988638
7:00:00	9380	117	0.0124733	0.987527	19737	164	0.00830927	0.991691	15456	101	0.00653468	0.993465	14947	175	0.011708	0.988292
7:30:00	9396	114	0.0121328	0.987867	19805	161	0.00812926	0.991871	15449	99	0.00640818	0.993592	15015	185	0.012321	0.987679
8:00:00	9443	120	0.0127078	0.987292	19861	183	0.00921404	0.990786	15482	100	0.00645911	0.993541	15013	200	0.0133218	0.986678
8:30:00	9424	127	0.0134762	0.986524	19891	188	0.00945151	0.990548	15554	113	0.00726501	0.992735	15007	215	0.0143266	0.985673
9:00:00	9440	132	0.0139831	0.986017	19904	204	0.0102492	0.989751	15490	118	0.00761782	0.992382	14959	230	0.0153754	0.984625
9:30:00	9442	138	0.0146155	0.985384	19982	213	0.0106596	0.98934	15519	127	0.00818352	0.991816	14977	243	0.0162249	0.983775
10:00:00	9472	144	0.0152027	0.984797	19986	244	0.0122085	0.987791	15503	135	0.00870799	0.991292	14938	269	0.0180078	0.981992
10:30:00	9454	147	0.015549	0.984451	19874	267	0.0134346	0.986565	15500	148	0.00954839	0.990452	14911	297	0.0199182	0.980082
11:00:00	9474	138	0.0145662	0.985434	19816	297	0.0149879	0.985012	15509	163	0.01051	0.98949	14864	337	0.0226722	0.977328
11:30:00	9466	145	0.015318	0.984682	19786	335	0.0169312	0.983069	15461	192	0.0124183	0.987582	14794	374	0.0252805	0.974719
12:00:00	9476	157	0.0165682	0.983432	19677	366	0.0186004	0.9814	15461	235	0.0151995	0.9848	14730	446	0.0302783	0.969722
12:30:00	9460	164	0.0173362	0.982664	19753	442	0.0223763	0.977624	15467	295	0.0190729	0.980927	14722	548	0.0372232	0.962777
13:00:00	9510	158	0.0166141	0.983386	19682	540	0.0274362	0.972564	15456	418	0.0270445	0.972955	14728	716	0.0486149	0.951385
13:30:00	9492	168	0.0176991	0.982301	19691	725	0.0368189	0.963181	15545	541	0.0348022	0.965198	14688	905	0.0616149	0.938385
14:00:00	9513	181	0.0190266	0.980973	19658	944	0.0480212	0.951979	15537	761	0.0489799	0.95102	14687	1168	0.0795261	0.920474
14:30:00	9506	185	0.0194614	0.980539	19767	1211	0.0612637	0.938736	15600	1044	0.0669231	0.933077	14715	1521	0.103364	0.896636
15:00:00	9530	204	0.0214061	0.978594	19805	1557	0.0786165	0.921383	15581	1372	0.088056	0.911944	14746	1933	0.131086	0.868914
15:30:00	9527	219	0.0229873	0.977013	19914	1954	0.0981219	0.901878	15643	1736	0.110976	0.889024	14785	2353	0.159148	0.840852
16:00:00	9542	234	0.0245232	0.975477	19958	2413	0.120904	0.879096	15649	2089	0.133491	0.866509	14800	2774	0.187432	0.812568
16:30:00	9577	263	0.0274616	0.972538	19975	2876	0.14398	0.85602	15682	2510	0.160056	0.839944	14806	3251	0.219573	0.780427
17:00:00	9572	295	0.0308191	0.969181	20061	3361	0.167539	0.832461	15709	2898	0.18448	0.81552	14822	3714	0.250573	0.749427
17:30:00	9599	304	0.03167	0.96833	20033	3831	0.191234	0.808766	15756	3256	0.206651	0.793349	14891	4117	0.276476	0.723524
18:00:00	9615	326	0.0339054	0.966095	20130	4247	0.210979	0.789021	15783	3615	0.229044	0.770956	14993	4529	0.302074	0.697926
18:30:00	9629	339	0.0352061	0.964794	20190	4614	0.228529	0.771471	15809	3880	0.24543	0.75457	14990	4914	0.327819	0.672181
19:00:00	9610	375	0.0390219	0.960978	20182	4945	0.24502	0.75498	15859	4138	0.260924	0.739076	15030	5237	0.348436	0.651564
19:30:00	9628	423	0.0439344	0.956066	20166	5302	0.262918	0.737082	15844	4338	0.273794	0.726206	14987	5549	0.370254	0.629746
20:00:00	9628	442	0.0459078	0.954092	20179	5592	0.27712	0.72288	15873	4553	0.286839	0.713161	15006	5788	0.385712	0.614288
20:30:00	9683	460	0.0475059	0.952494	20135	5873	0.291681	0.708319	15850	4745	0.299369	0.700631	15021	6026	0.401172	0.598828
21:00:00	9682	482	0.0497831	0.950217	20170	6118	0.303322	0.696678	15833	4897	0.309291	0.690709	15060	6194	0.411288	0.588712
21:30:00	9684	503	0.0519413	0.948059	20165	6334	0.314109	0.685891	15805	5025	0.317937	0.682063	15000	6395	0.426333	0.573667
22:00:00	9659	511	0.052904	0.947096	20193	6510	0.322389	0.677611	15849	5125	0.323364	0.676636	15023	6562	0.436797	0.563203
22:30:00	9685	537	0.0554466	0.944553	20116	6708	0.333466	0.666534	15855	5216	0.328981	0.671019	15025	6717	0.447055	0.552945
23:00:00	9704	578	0.0595631	0.940437	20151	6866	0.340728	0.659272	15858	5334	0.33636	0.66364	15062	6811	0.452198	0.547802
23:30:00	9699	605	0.0623776	0.937622	20153	7000	0.347343	0.652657	15842	5417	0.341939	0.658061	15138	6926	0.457524	0.542476
1 day, 0:00:00	9705	636	0.0655332	0.934467	20124	7139	0.354751	0.645249	15876	5462	0.344041	0.655959	15098	7043	0.466486	0.533514
1 day, 0:30:00	9719	680	0.069966	0.930034	20104	7245	0.360376	0.639624	15846	5552	0.350372	0.649628	15139	7148	0.472158	0.527842
1 day, 1:00:00	9731	720	0.0739903	0.92601	20131	7360	0.365605	0.634395	15815	5625	0.355675	0.644325	15133	7212	0.476574	0.523426
1 day, 1:30:00	9703	780	0.0803875	0.919612	20165	7476	0.370741	0.629259	15837	5687	0.359096	0.640904	15086	7314	0.48482	0.51518
1 day, 2:00:00	9728	854	0.0877878	0.912212	20159	7619	0.377945	0.622055	15866	5721	0.360582	0.639418	15131	7392	0.488533	0.511467
1 day, 2:30:00	9696	897	0.0925124	0.907488	20133	7670	0.380967	0.619033	15946	5789	0.363038	0.636962	15159	7497	0.494558	0.505442
1 day, 3:00:00	9682	988	0.102045	0.897955	20214	7783	0.38503	0.61497	15945	5781	0.362559	0.637441	15109	7564	0.500629	0.499371
1 day, 3:30:00	9714	1076	0.110768	0.889232	20124	7843	0.389734	0.610266	15913	5789	0.363791	0.636209	15141	7638	0.504458	0.495542
1 day, 4:00:00	9710	1190	0.122554	0.877446	20142	7901	0.392265	0.607735	15911	5827	0.366225	0.633775	15166	7717	0.508836	0.491164
1 day, 4:30:00	9718	1291	0.132846	0.867154	20159	8011	0.397391	0.602609	15925	5868	0.368477	0.631523	15145	7765	0.51271	0.48729
1 day, 5:00:00	9714	1424	0.146593	0.853407	20110	8031	0.399354	0.600646	15945	5889	0.369332	0.630668	15183	7842	0.516499	0.483501
1 day, 5:30:00	9676	1566	0.161844	0.838156	20058	8161	0.40687	0.59313	15927	5888	0.369687	0.630313	15156	7951	0.524611	0.475389
1 day, 6:00:00	9720	1731	0.178086	0.821914	20100	8310	0.413433	0.586567	15899	5947	0.374049	0.625951	15171	8026	0.529036	0.470964
1 day, 6:30:00	9707	1872	0.192851	0.807149	20108	8433	0.419385	0.580615	15958	5973	0.374295	0.625705	15139	8142	0.537816	0.462184
1 day, 7:00:00	9703	2051	0.211378	0.788622	20097	8580	0.426929	0.573071	15928	6039	0.379144	0.620856	15200	8226	0.541184	0.458816
1 day, 7:30:00	9694	2249	0.231999	0.768001	20049	8761	0.436979	0.563021	15929	6095	0.382635	0.617365	15169	8333	0.549344	0.450656
1 day, 8:00:00	9697	2458	0.25348	0.74652	20035	9000	0.449214	0.550786	15909	6155	0.386888	0.613112	15196	8457	0.556528	0.443472
1 day, 8:30:00	9695	2676	0.276019	0.723981	20053	9216	0.459582	0.540418	15925	6221	0.390644	0.609356	15192	8588	0.565298	0.434702
1 day, 9:00:00	9675	2858	0.295401	0.704599	20079	9545	0.475372	0.524628	15869	6351	0.400214	0.599786	15233	8714	0.572048	0.427952
1 day, 9:30:00	9693	3059	0.315589	0.684411	20041	9899	0.493937	0.506063	15876	6490	0.408793	0.591207	15200	8892	0.585	0.415
1 day, 10:00:00	9676	3228	0.333609	0.666391	20096	10278	0.511445	0.488555	15841	6620	0.417903	0.582097	15251	9023	0.591633	0.408367
1 day, 10:30:00	9702	3409	0.351371	0.648629	20134	10667	0.5298	0.4702	15846	6800	0.42913	0.57087	15273	9225	0.604007	0.395993
1 day, 11:00:00	9669	3619	0.374289	0.625711	20077	11097	0.552722	0.447278	15865	6950	0.438071	0.561929	15218	9455	0.621304	0.378696
1 day, 11:30:00	9664	3823	0.395592	0.604408	20084	11545	0.574836	0.425164	15857	7187	0.453238	0.546762	15271	9653	0.632113	0.367887
1 day, 12:00:00	9611	3991	0.415253	0.584747	20160	12017	0.596081	0.403919	15883	7440	0.468425	0.531575	15247	9878	0.647865	0.352135
1 day, 12:30:00	9572	4179	0.436586	0.563414	20166	12476	0.618665	0.381335	15831	7660	0.483861	0.516139	15261	10107	0.662276	0.337724
1 day, 13:00:00	9554	4344	0.454679	0.545321	20184	12972	0.642687	0.357313	15792	7905	0.50057	0.49943	15232	10380	0.68146	0.31854
1 day, 13:30:00	9582	4486	0.468169	0.531831	20183	13348	0.661349	0.338651	15752	8142	0.516887	0.483113	15231	10653	0.699429	0.300571
1 day, 14:00:00	9493	4665	0.491415	0.508585	20155	13800	0.684694	0.315306	15720	8350	0.53117	0.46883	15287	10899	0.712959	0.287041
1 day, 14:30:00	9481	4802	0.506487	0.493513	20173	14130	0.700441	0.299559	15728	8559	0.544189	0.455811	15341	11170	0.728114	0.271886
1 day, 15:00:00	9418	4928	0.523253	0.476747	20141	14414	0.715655	0.284345	15688	8772	0.559153	0.440847	15301	11493	0.751127	0.248873
1 day, 15:30:00	9388	5013	0.53398	0.46602	20158	14709	0.729685	0.270315	15625	8982	0.574848	0.425152	15334	11770	0.767575	0.232425
